# Supplementary material for: Properties of MHC Class I Presented Peptides That Enhance Immunogenicity
Source: PLoS Comput Biol. 2013 Oct 24;9(10):e1003266. doi: 10.1371/journal.pcbi.1003266 (PMC3808449; doi:10.1371/journal.pcbi.1003266)
Supplement: Dataset S1 — A table with all immunogenic and non-immunogenic pMHCs that were found in the IEDB, Vaccinia, Arena and Coxiella data sets ( Methods ). On each row, the peptide sequence (column A), the presenting MHC molecule (column B), the host (column C) and the immunogenicity (column D) are described. (XLS) [file pcbi.1003266.s001.xls]

## Sheet: Sheet1
Peptide	MHC	Species	Immunogenicity
AAFDRKSDAK	HLA-A1101	Homo	immunogenic
AAFEFINSL	H-2-Kb	Mus	immunogenic
AAHARFVAA	HLA-B0801	Homo	immunogenic
AAIGNMTLL	H-2-Db	Mus	immunogenic
AAITIATPI	H-2-Db	Mus	non-immunogenic
AALLNVFLI	H-2-Db	Mus	non-immunogenic
AARDRFPGL	HLA-B0702	Homo	immunogenic
AARQRLQDI	HLA-B0801	Homo	immunogenic
AAVQSATSM	H-2-Db	Mus	immunogenic
ACVHNQDII	H-2-Db	Mus	immunogenic
AEIEDLIFLA	HLA-B4403	Homo	immunogenic
AEMKTDAA	HLA-B4501	Homo	immunogenic
AEMKTDAATL	HLA-B4403	Homo	immunogenic
AEMWAQDAA	HLA-B4501	Homo	immunogenic
AESRKLLLI	HLA-B4403	Homo	immunogenic
AEVLKDAI	H-2-Kk	Mus	non-immunogenic
AEWDRVHPV	HLA-B4002	Homo	immunogenic
AEWPTFNVGW	HLA-B4403	Homo	immunogenic
AGPHNDMEI	H-2-Db	Mus	immunogenic
AGPKLIAAL	H-2-Dd	Mus	non-immunogenic
AGPPRYSRI	H-2-Dd	Mus	immunogenic
AGVDNRECI	H-2-Db	Mus	immunogenic
AGYIYYQL	H-2-Kb	Mus	immunogenic
AIFQPESQR	HLA-A1101	Mus	non-immunogenic
AIIKEAMRK	HLA-A1101	Mus	immunogenic
AIISGDSPV	HLA-A0201	Homo	immunogenic
AILCSPSKR	HLA-A1101	Mus	non-immunogenic
AILKFKSL	H-2-Kb	Mus	immunogenic
AIMDKNIIL	HLA-A0201	Homo	immunogenic
AIMDKNIML	HLA-A0201	Homo	immunogenic
AINGVMWTV	HLA-A0201	Homo	immunogenic
AINIALIAV	HLA-A0201	Mus	immunogenic
AIVMEAMRK	HLA-A1101	Mus	non-immunogenic
AIVNYANL	H-2-Kb	Mus	immunogenic
AIYDTMQYV	HLA-A0201	Homo	immunogenic
AIYQPESQK	HLA-A1101	Mus	immunogenic
AIYQPESQR	HLA-A1101	Mus	non-immunogenic
AIYSFRNA	H-2-Kb	Mus	immunogenic
AKYNFTLL	H-2-Kb	Mus	immunogenic
ALAEGDLLA	HLA-A0201	Homo	immunogenic
ALASCMGLIY	HLA-A0101	Homo	immunogenic
ALDEGLLPV	HLA-A0201	Homo	immunogenic
ALETSVHEI	HLA-A0201	Mus	immunogenic
ALFFFDIDLL	HLA-A0201	Homo	immunogenic
ALFGIKLPAL	HLA-A0201	Mus	non-immunogenic
ALFQPAGSK	HLA-A1101	Mus	non-immunogenic
ALGGGATGV	HLA-A0201	Homo	immunogenic
ALIDCNPCTL	HLA-A0201	Homo	immunogenic
ALIGILSLFV	HLA-A0201	Homo	immunogenic
ALIPYCVHM	HLA-A0201	Mus	immunogenic
ALKGMINLWK	HLA-A1101	Mus	non-immunogenic
ALLEDPVGT	HLA-A0201	Homo	immunogenic
ALLEDPVGT	HLA-A0201	Mus	immunogenic
ALLGGLRPV	HLA-A0201	Homo	immunogenic
ALLMPAGVPL	HLA-A0201	Homo	immunogenic
ALLNIKVKL	HLA-A0201	Homo	immunogenic
ALLPTALDAL	HLA-A0201	Homo	immunogenic
ALLVLYSFA	HLA-A0201	Homo	immunogenic
ALLVLYSFAL	HLA-A0201	Mus	immunogenic
ALMDCIMFDA	HLA-A0201	Mus	immunogenic
ALMPLYACI	HLA-A0201	Homo	immunogenic
ALNIALIAV	HLA-A0201	Mus	immunogenic
ALNIALVAV	HLA-A0201	Mus	immunogenic
ALPHIIDEV	HLA-A0201	Mus	immunogenic
ALQAIELQL	HLA-A0201	Homo	immunogenic
ALQAIELQL	HLA-A0201	Mus	immunogenic
ALQLLLEV	HLA-A0201	Homo	immunogenic
ALSDHHIYL	HLA-A0201	Mus	immunogenic
ALSGVFCGV	HLA-A0201	Mus	immunogenic
ALSLAAVLV	HLA-A0201	Homo	immunogenic
ALSLAAVLVV	HLA-A0201	Homo	immunogenic
ALSSSLGNV	HLA-A0201	Homo	immunogenic
ALSTGLIHL	HLA-A0201	Mus	immunogenic
ALTAVAEEV	HLA-A0201	Homo	immunogenic
ALTAVAEEV	HLA-A0201	Mus	immunogenic
ALVNAVNKL	HLA-A0201	Homo	immunogenic
ALVNFLRHL	HLA-A0201	Homo	immunogenic
ALWALPHAA	HLA-A0201	Homo	immunogenic
ALWDSKFFT	HLA-A0201	Homo	immunogenic
ALWMRLLPL	HLA-A0201	Homo	immunogenic
ALWMRLLPLL	HLA-A0201	Homo	immunogenic
ALYDVVSKL	HLA-A0201	Homo	immunogenic
ALYDVVSTL	HLA-A0201	Homo	immunogenic
ALYDVVSTL	HLA-A0201	Mus	immunogenic
ALYDVVTKL	HLA-A0201	Homo	immunogenic
ALYEVVSKL	HLA-A0201	Homo	immunogenic
ALYLVCGER	HLA-A0301	Homo	immunogenic
AMAGASTSA	HLA-A0201	Homo	immunogenic
AMAGSIDLL	HLA-A0201	Homo	immunogenic
AMASTEGNV	HLA-A0201	Homo	immunogenic
AMDSNTLEL	HLA-A0201	Mus	immunogenic
AMEDLVRAY	HLA-A3002	Homo	immunogenic
AMLDLLKSV	HLA-A0201	Homo	immunogenic
AMLQLDPNA	HLA-A0201	Mus	non-immunogenic
AMLTAFFLR	HLA-A1101	Homo	immunogenic
AMLVLLAEI	HLA-A0201	Homo	immunogenic
AMPGVLSYV	HLA-A0201	Mus	immunogenic
AMSTTDLEA	HLA-A0201	Mus	non-immunogenic
AMWLLLLSI	HLA-A0201	Mus	immunogenic
ANFKFRDL	H-2-Kb	Mus	immunogenic
ANHRFTLV	H-2-Kb	Mus	immunogenic
ANYDFTLV	H-2-Kb	Mus	immunogenic
ANYKFTLL	H-2-Kb	Mus	immunogenic
ANYKFTLV	H-2-Kb	Mus	immunogenic
ANYNFTLL	H-2-Kb	Mus	immunogenic
ANYNFTLV	H-2-Kb	Mus	immunogenic
ANYNLTLV	H-2-Kb	Mus	immunogenic
APGWLIWTY	HLA-B3501	Homo	immunogenic
APIFYPPVL	HLA-B0702	Homo	immunogenic
APKTPDACL	HLA-B0702	Homo	immunogenic
APNPNRFVI	HLA-B0702	Homo	immunogenic
APRAWISSL	HLA-B0702	Homo	immunogenic
APRLPDDPI	HLA-B0702	Homo	immunogenic
APRQWPMPL	HLA-B0702	Homo	immunogenic
APTAGAFFF	H-2-Ld	Mus	immunogenic
APVFPSHHL	HLA-B0702	Mus	immunogenic
APVLRDIDL	HLA-B0702	Mus	immunogenic
APVPPPEPL	HLA-B0702	Homo	immunogenic
AQMSIQLINK	HLA-A1101	Mus	immunogenic
AQPGLLSYV	HLA-A0201	Mus	immunogenic
ARKLLLDNL	HLA-B2705	Homo	immunogenic
ARKLLLDNL	HLA-B2705	Mus	immunogenic
ARLGKGYMF	HLA-B2705	Homo	immunogenic
ARVYEIKCR	HLA-B2705	Homo	immunogenic
ASFKVAFSK	HLA-A1101	Mus	non-immunogenic
ASFVNPIYL	H-2-Db	Mus	immunogenic
ASGFIGFCK	HLA-A1101	Mus	immunogenic
ASIRNPDPV	H-2-Db	Mus	non-immunogenic
ASKQYIHCFR	HLA-A1101	Mus	non-immunogenic
ASNENMDAM	H-2-Db	Mus	immunogenic
ASNENMDTM	H-2-Db	Mus	immunogenic
ASNENMETM	H-2-Db	Mus	immunogenic
ASNENMEVM	H-2-Db	Mus	immunogenic
ASNVNADII	H-2-Db	Mus	immunogenic
ASVQRMMRR	HLA-A1101	Mus	non-immunogenic
ATDALMTGF	HLA-A0101	Homo	immunogenic
ATDALMTGY	HLA-A0101	Homo	immunogenic
ATFRDMLLNV	HLA-A0201	Mus	non-immunogenic
ATIGTAMYK	HLA-A1101	Homo	immunogenic
ATLTYRML	H-2-Kb	Mus	immunogenic
ATQIPSYKK	HLA-A1101	Homo	immunogenic
ATQPAAEFR	HLA-A1101	Mus	immunogenic
ATQPAAEFRR	HLA-A1101	Mus	immunogenic
ATSLDVINY	HLA-A1101	Homo	immunogenic
ATSTGDVVY	HLA-A0101	Homo	immunogenic
ATTFLQTMLR	HLA-A6801	Homo	immunogenic
ATVKNVVLR	HLA-A1101	Mus	immunogenic
ATWAENIQV	HLA-A0201	Homo	immunogenic
ATYLGPQFCK	HLA-A1101	Mus	immunogenic
AVADHVAAV	HLA-A0201	Homo	immunogenic
AVAEAQCKK	HLA-A0301	Homo	immunogenic
AVDLSHFLK	HLA-A0301	Homo	immunogenic
AVDLSHFLK	HLA-A1101	Homo	immunogenic
AVDLSHFLK	HLA-A3001	Homo	immunogenic
AVESCPLMR	HLA-A1101	Mus	immunogenic
AVFDRKSDAK	HLA-A1101	Homo	immunogenic
AVFKDSFLRK	HLA-A0301	Homo	immunogenic
AVFKDSFLRK	HLA-A1101	Homo	immunogenic
AVFNRKSDAK	HLA-A1101	Homo	immunogenic
AVGGAVASV	HLA-A0201	Homo	immunogenic
AVGGAVASV	HLA-A0201	Mus	immunogenic
AVKDVTITKK	HLA-A0301	Homo	immunogenic
AVLCSPSKR	HLA-A1101	Mus	non-immunogenic
AVLPRDMVFR	HLA-A1101	Mus	non-immunogenic
AVNGVLWTV	HLA-A0201	Homo	immunogenic
AVNGVMWTV	HLA-A0201	Homo	immunogenic
AVNNLVELK	HLA-A1101	Mus	immunogenic
AVPDDLYIK	HLA-A1101	Homo	immunogenic
AVSIISILK	HLA-A1101	Mus	immunogenic
AVSLIAALK	HLA-A1101	Mus	immunogenic
AVSLIAIIK	HLA-A1101	Mus	immunogenic
AVVQFIRV	H-2-Kb	Mus	immunogenic
AVVSLLRLLK	HLA-A0301	Homo	immunogenic
AVYGNIKHK	HLA-A0301	Homo	immunogenic
AVYGNIKHK	HLA-A1101	Homo	immunogenic
AVYNFATC	H-2-Kb	Mus	immunogenic
AVYNFATCGI	H-2-Kb	Mus	immunogenic
AVYNFATCGI	HLA-A0201	Mus	immunogenic
AYAGLFTPL	H-2-Kd	Mus	immunogenic
AYAKRAAEL	H-2-Kd	Mus	immunogenic
AYAQKIFKI	HLA-A2402	Homo	immunogenic
AYASIPALL	H-2-Kd	Mus	immunogenic
AYERMCNIL	H-2-Kd	Mus	immunogenic
AYGAGQTML	H-2-Kd	Mus	immunogenic
AYLAVSEAL	H-2-Kd	Mus	immunogenic
AYLVVKTLI	H-2-Kd	Mus	immunogenic
AYNKANWFL	H-2-Kd	Mus	immunogenic
AYQEIVKAL	H-2-Kd	Mus	non-immunogenic
AYQPALEKI	H-2-Kd	Mus	immunogenic
AYREMTGKI	H-2-Kd	Mus	immunogenic
AYSVSASSL	H-2-Kd	Mus	immunogenic
AYTSVAEML	H-2-Kd	Mus	non-immunogenic
AYVELQTEL	H-2-Kd	Mus	immunogenic
CEDVPSGKL	HLA-B4001	Homo	immunogenic
CINGACWTV	HLA-A0201	Homo	immunogenic
CINGCVWTV	HLA-A0201	Homo	immunogenic
CINGLCWTV	HLA-A0201	Homo	immunogenic
CINGVCWSI	HLA-A0201	Homo	immunogenic
CINGVCWSV	HLA-A0201	Homo	immunogenic
CINGVCWTV	HLA-A0201	Homo	immunogenic
CINGVCWTV	HLA-A0201	Mus	immunogenic
CINGVMWTL	HLA-A0201	Homo	immunogenic
CISGVCWTV	HLA-A0201	Homo	immunogenic
CISPNVGNLK	HLA-A1101	Mus	non-immunogenic
CITSMAERFK	HLA-A1101	Mus	non-immunogenic
CLDAGINYV	HLA-A0201	Mus	immunogenic
CLFKDWEEL	HLA-A0201	Homo	immunogenic
CLFKDWEEL	HLA-A0201	Mus	immunogenic
CLGGLLTMV	HLA-A0201	Homo	immunogenic
CLGGLLTMV	HLA-A0201	Mus	immunogenic
CLGLLTMV	HLA-A0201	Homo	immunogenic
CLLIRPLLL	HLA-A0201	Mus	non-immunogenic
CLLPKMDSV	HLA-A0201	Homo	immunogenic
CLLPKMDSVV	HLA-A0201	Homo	immunogenic
CLLQSLQQI	HLA-A0201	Mus	non-immunogenic
CLLSGTYIFA	HLA-A0201	Homo	immunogenic
CLTEYILWV	HLA-A0201	Homo	immunogenic
CLTEYILWV	HLA-A0201	Mus	immunogenic
CMAFTIPSI	HLA-A0201	Mus	non-immunogenic
CMLNNSFYY	HLA-A1101	Mus	non-immunogenic
CMLTEFLHY	HLA-A2902	Homo	immunogenic
CNRIYARL	H-2-Kb	Mus	immunogenic
CPNFASVVL	H-2-Ld	Mus	immunogenic
CPNSSIVY	HLA-B3501	Homo	immunogenic
CSADNSHHYI	H-2-Db	Mus	immunogenic
CSANNAHHYI	H-2-Db	Mus	immunogenic
CSANNSHHYI	H-2-Db	Mus	immunogenic
CSIENFDPM	H-2-Db	Mus	non-immunogenic
CSLRNGPHL	H-2-Db	Mus	immunogenic
CSLWNGLHL	H-2-Db	Mus	immunogenic
CSLWNGPHL	H-2-Db	Mus	immunogenic
CSNSHVNTLR	HLA-A1101	Mus	non-immunogenic
CTELKLSDY	HLA-A0101	Homo	immunogenic
CTNGVCWTV	HLA-A0201	Homo	immunogenic
CVETMCNEY	HLA-A0101	Homo	immunogenic
CVGIGGDPI	H-2-Kb	Mus	non-immunogenic
CVNGACWTV	HLA-A0201	Homo	immunogenic
CVNGSCFTV	HLA-A0201	Homo	immunogenic
CVNGSCFTV	HLA-A0201	Mus	immunogenic
CVNGVCWTV	HLA-A0201	Homo	immunogenic
CVNGVCWTV	HLA-A0201	Mus	immunogenic
CVSTMAERFK	HLA-A1101	Mus	non-immunogenic
CVTSLVEMFK	HLA-A1101	Mus	immunogenic
CVYCKQQLL	H-2-Kb	Mus	immunogenic
CYGVSATKL	H-2-Kd	Mus	immunogenic
CYKGVSCSI	H-2-Kd	Mus	immunogenic
CYLENIEII	H-2-Kd	Mus	immunogenic
CYLTDRARI	H-2-Kd	Mus	immunogenic
CYNAVLTHV	H-2-Kd	Mus	immunogenic
CYSIEPLDL	HLA-A2402	Homo	immunogenic
CYSQVNPTTL	H-2-Kd	Mus	immunogenic
DALSAQLY	HLA-B3501	Mus	non-immunogenic
DAVLYYHMM	H-2-Kb	Mus	immunogenic
DEGEGRVI	H-2-Kk	Mus	immunogenic
DELRRKMMY	HLA-B1801	Homo	immunogenic
DELVDPINY	HLA-B4403	Homo	immunogenic
DEVEFLGHY	HLA-B1801	Homo	immunogenic
DIYKGVYQFK	HLA-A1101	Mus	immunogenic
DLLDTASALY	HLA-A0101	Mus	immunogenic
DLMGYIPAV	HLA-A0201	Homo	immunogenic
DLMGYIPLV	HLA-A0201	Homo	immunogenic
DLMGYIPLV	HLA-A0201	Mus	immunogenic
DLMGYLPLV	HLA-A0201	Homo	immunogenic
DMCDIYLLY	HLA-A0101	Homo	immunogenic
DMCDIYLLY	HLA-A2601	Homo	immunogenic
DMCDIYLLY	HLA-A2902	Homo	immunogenic
DMSKLISLK	HLA-A1101	Mus	non-immunogenic
DPAKPARLL	HLA-B0702	Mus	non-immunogenic
DPILRSLAY	HLA-B3501	Mus	non-immunogenic
DPRRRSRNL	HLA-B0702	Homo	immunogenic
DRLALLANL	HLA-B2705	Homo	immunogenic
DSMDYLILK	HLA-A1101	Mus	immunogenic
DSVCACGLFK	HLA-A1101	Mus	immunogenic
DTFLFTQYL	H-2-Kb	Mus	non-immunogenic
DTPVLPHETR	HLA-A6801	Homo	immunogenic
DTVNRTHQY	HLA-A2601	Homo	immunogenic
DVCFWSTLFY	HLA-A1101	Mus	non-immunogenic
DVIELAYQK	HLA-A1101	Mus	non-immunogenic
DVKFHTQAF	HLA-A2601	Homo	immunogenic
DYCNVLNKEF	HLA-A2402	Homo	immunogenic
DYLQYVLQI	HLA-A2402	Homo	immunogenic
EAGHIEPY	HLA-B3501	Mus	non-immunogenic
EAYCTGMLK	HLA-A1101	Mus	non-immunogenic
EEGAIVGEI	H-2-Kk	Mus	immunogenic
EENLLDFVRF	HLA-B4403	Homo	immunogenic
EERHIFLDY	HLA-B4403	Homo	immunogenic
EIYKRWII	HLA-B0801	Homo	immunogenic
ELAAKLVAL	HLA-B0801	Homo	immunogenic
ELAEYLYNI	HLA-A0201	Homo	immunogenic
ELAEYLYNI	HLA-A0201	Mus	immunogenic
ELAGIGILTV	HLA-A0201	Homo	immunogenic
ELAGWGILTV	HLA-A0201	Homo	immunogenic
ELKRKMIYM	HLA-B0801	Homo	immunogenic
ELKRKMMYM	HLA-B0801	Homo	immunogenic
ELRRKMMYM	HLA-B0801	Homo	immunogenic
ELRSRYWAI	HLA-B0801	Homo	immunogenic
EMKTDAATL	HLA-B0801	Homo	immunogenic
EPEPDVAVL	HLA-B3501	Homo	immunogenic
EPEPDVAW	HLA-B3501	Homo	immunogenic
EPLARLEL	HLA-B0801	Homo	immunogenic
EPPFGDGYI	H-2-Ld	Mus	non-immunogenic
EPRYTYWQL	HLA-B0702	Homo	immunogenic
EQYKFYSV	H-2-Kb	Mus	immunogenic
ERFLAQEQL	HLA-B2705	Homo	immunogenic
ERFLAQEQL	HLA-B2705	Mus	immunogenic
ESLFRAVITK	HLA-A1101	Homo	immunogenic
ESLVMRML	H-2-Kb	Mus	non-immunogenic
ETDDYMFFV	HLA-A0201	Mus	non-immunogenic
ETDNAGLKEY	HLA-A2601	Homo	immunogenic
ETIKGGRHL	HLA-A2601	Homo	immunogenic
ETNITDIEK	HLA-A1101	Mus	non-immunogenic
ETPGGYCLTR	HLA-A1101	Mus	immunogenic
ETSVMLAKR	HLA-A6801	Homo	immunogenic
EVENVSVNV	HLA-A6901	Homo	immunogenic
EVIKGGRHL	HLA-A2601	Homo	immunogenic
EVIPMFSAL	HLA-A2601	Homo	immunogenic
EVISVMKRR	HLA-A6801	Homo	immunogenic
EVVTSTWVL	HLA-A2601	Homo	immunogenic
EYLVSFGVW	HLA-A2402	Homo	immunogenic
EYLVSFGVW	HLA-A2402	Mus	immunogenic
EYRHYCYSL	HLA-A2402	Homo	immunogenic
EYTTVLTFL	H-2-Kd	Mus	immunogenic
EYVLLLFLL	HLA-A2402	Homo	immunogenic
FAAAFFPAV	HLA-A0201	Homo	immunogenic
FAAAFFPAV	HLA-A0201	Mus	non-immunogenic
FAAAFFPAV	HLA-A0202	Homo	immunogenic
FAAAFFPAV	HLA-A0203	Homo	immunogenic
FAAAFFPAV	HLA-A0206	Homo	immunogenic
FAAAFFPAV	HLA-A6802	Homo	immunogenic
FAAEFKSRF	H-2-Kb	Mus	immunogenic
FAFKDLFVV	HLA-A0201	Homo	immunogenic
FAFRDLCIV	HLA-A0201	Homo	immunogenic
FAIKNTDDV	H-2-Db	Mus	immunogenic
FALISFLLL	H-2-Db	Mus	immunogenic
FALISFLLL	H-2-Kb	Mus	non-immunogenic
FALLSLDQI	H-2-Db	Mus	non-immunogenic
FALSNAEDL	H-2-Db	Mus	immunogenic
FANCNFTLV	HLA-A0201	Homo	immunogenic
FANHDFTLV	HLA-A0201	Homo	immunogenic
FANHKFTLV	HLA-A0201	Homo	immunogenic
FANHNFTLV	HLA-A0201	Homo	immunogenic
FANNEFTLV	HLA-A0201	Homo	immunogenic
FANNKFTLV	HLA-A0201	Homo	immunogenic
FANYKFTLV	HLA-A0201	Homo	immunogenic
FANYNFTLV	HLA-A0201	Homo	immunogenic
FAPGNYPAL	H-2-Db	Mus	immunogenic
FAPGNYPAL	H-2-Kb	Mus	immunogenic
FASFKVAFSK	HLA-A1101	Mus	immunogenic
FAVTNDGVI	H-2-Db	Mus	immunogenic
FAVYNFATA	H-2-Db	Mus	immunogenic
FEANGNLI	H-2-Kk	Mus	immunogenic
FEFTSFFY	HLA-B4403	Homo	immunogenic
FFQFCPLIF	HLA-A2402	Homo	immunogenic
FGIDLLWSV	HLA-A0201	Mus	immunogenic
FGISNYCQI	H-2-Db	Mus	immunogenic
FIAGLIAIV	HLA-A0201	Homo	immunogenic
FIAGLIAIV	HLA-A0201	Mus	immunogenic
FIALWIPDL	HLA-A0201	Mus	immunogenic
FIDSYICQV	HLA-A0201	Homo	immunogenic
FIFDALAEV	HLA-A0201	Homo	immunogenic
FIFPASKVYL	HLA-A0201	Homo	immunogenic
FIFQVNTSK	HLA-A1101	Mus	non-immunogenic
FILGIIITV	HLA-A0201	Homo	immunogenic
FILGIIITV	HLA-A0201	Mus	immunogenic
FIPENQRTV	HLA-A0201	Mus	immunogenic
FISDKIKFL	HLA-A0201	Homo	immunogenic
FIVVATAAV	HLA-A0201	Mus	immunogenic
FIYAGSLSAL	HLA-A0201	Homo	immunogenic
FIYAGSLSAL	HLA-A0201	Mus	immunogenic
FIYTYDRV	H-2-Kb	Mus	immunogenic
FLDLPLPWL	HLA-A0201	Homo	immunogenic
FLDLPLPWT	HLA-A0201	Homo	immunogenic
FLFAVGFYL	HLA-A0201	Homo	immunogenic
FLFWFLKSGA	HLA-A0201	Mus	non-immunogenic
FLGGTRVCL	HLA-A0201	Homo	immunogenic
FLGLFILSHL	HLA-A0201	Mus	immunogenic
FLHCIVFNV	HLA-A0201	Homo	immunogenic
FLIVLSVAL	HLA-A0201	Homo	immunogenic
FLIVSLCPT	HLA-A0201	Mus	immunogenic
FLKDVMESM	HLA-A0201	Homo	immunogenic
FLKEKKGL	HLA-B0801	Homo	immunogenic
FLLALLSCL	HLA-A0201	Homo	immunogenic
FLLCFCVLL	HLA-A0201	Homo	immunogenic
FLLCFCVLL	HLA-A0201	Mus	immunogenic
FLLDILGAT	HLA-A0201	Homo	immunogenic
FLLENAAYL	HLA-A0201	Homo	immunogenic
FLLGLLFFV	HLA-A0201	Homo	immunogenic
FLLGLLVHV	HLA-A0201	Homo	immunogenic
FLLGLLVHV	HLA-A0201	Mus	immunogenic
FLLGLLVHV	HLA-A0202	Homo	immunogenic
FLLGLLVHV	HLA-A0203	Homo	immunogenic
FLLGLLVHV	HLA-A0206	Homo	immunogenic
FLLGLLVHV	HLA-A6802	Homo	immunogenic
FLLIRNSTWK	HLA-A1101	Mus	non-immunogenic
FLLIRYITT	HLA-A0201	Mus	immunogenic
FLLKAEVQKL	HLA-A0201	Homo	immunogenic
FLLLADARV	HLA-A0201	Homo	immunogenic
FLLLADARV	HLA-A0201	Mus	immunogenic
FLLPLTSLV	HLA-A0201	Mus	immunogenic
FLLPLTSLVI	HLA-A0201	Mus	immunogenic
FLLSLGIHL	HLA-A0201	Homo	immunogenic
FLLSLGIHL	HLA-A0201	Mus	immunogenic
FLLTKILTI	HLA-A0201	Homo	immunogenic
FLLTKILTI	HLA-A0201	Mus	immunogenic
FLLTRILTI	HLA-A0201	Homo	immunogenic
FLLTRILTI	HLA-A0201	Mus	immunogenic
FLLTRILTL	HLA-A0201	Homo	immunogenic
FLLVAHYAI	HLA-A0201	Homo	immunogenic
FLLVAHYAI	HLA-A0201	Mus	immunogenic
FLMDRHIIV	HLA-A0201	Homo	immunogenic
FLMLVGGSTL	HLA-A0201	Homo	immunogenic
FLMMNKDEL	H-2-Db	Mus	immunogenic
FLNAFGMYSL	HLA-A0201	Mus	immunogenic
FLNISWFYI	HLA-A0201	Homo	immunogenic
FLNISWFYI	HLA-A0201	Mus	immunogenic
FLNQTDETL	HLA-A0201	Homo	immunogenic
FLNSLAIHEK	HLA-A0301	Homo	immunogenic
FLNSLAIHEK	HLA-A1101	Homo	immunogenic
FLNWQNLLNV	HLA-A0201	Homo	immunogenic
FLPATLTMT	HLA-A0201	Mus	non-immunogenic
FLPIIFDAFL	HLA-A0201	Mus	immunogenic
FLPSDFFPSI	HLA-A0201	Homo	immunogenic
FLPSDFFPSI	HLA-A0201	Mus	immunogenic
FLPSDFFPSV	HLA-A0201	Homo	immunogenic
FLPSDFFPSV	HLA-A0201	Mus	immunogenic
FLQDVMNIL	HLA-A0201	Homo	immunogenic
FLQDVMNIL	HLA-A0201	Mus	immunogenic
FLRGRAYGI	HLA-B0801	Homo	immunogenic
FLRGRAYGL	HLA-A0201	Homo	immunogenic
FLRGRAYGL	HLA-B0801	Homo	immunogenic
FLRVPCWKI	HLA-A0201	Mus	immunogenic
FLSFASLFL	HLA-A0201	Mus	immunogenic
FLSHDFTLV	HLA-A0201	Homo	immunogenic
FLSHNFTLV	HLA-A0201	Homo	immunogenic
FLSHNFTLVF	HLA-A0201	Homo	immunogenic
FLSLMSLSI	HLA-A0201	Mus	immunogenic
FLSLSLLVI	HLA-A0201	Homo	immunogenic
FLSLSLLVI	HLA-A0201	Mus	immunogenic
FLSLSLLVI	HLA-A0202	Homo	immunogenic
FLSLSLLVI	HLA-A0203	Homo	immunogenic
FLSMLNLTKY	HLA-A0101	Homo	immunogenic
FLSMLNLTKY	HLA-A2902	Homo	immunogenic
FLTDYIPGA	HLA-A0201	Homo	immunogenic
FLTDYIPGA	HLA-A0201	Mus	immunogenic
FLTDYIPGA	HLA-A0202	Homo	immunogenic
FLTDYIPGA	HLA-A0203	Homo	immunogenic
FLTDYIPGA	HLA-A0206	Homo	immunogenic
FLTGTFVTA	HLA-A0201	Mus	immunogenic
FLTSVINRV	HLA-A0201	Homo	immunogenic
FLTSVINRV	HLA-A0201	Mus	immunogenic
FLVDAIVRV	HLA-A0201	Homo	immunogenic
FLVDAIVRVA	HLA-A0201	Homo	immunogenic
FLVFQMLV	HLA-A0201	Homo	immunogenic
FLVIAINAM	HLA-A0201	Homo	immunogenic
FLVPFVVFL	HLA-A0201	Homo	immunogenic
FLVPFVVFL	HLA-A0201	Mus	immunogenic
FLVSQLFTF	HLA-A0201	Homo	immunogenic
FLWGPRAYA	HLA-A0201	Homo	immunogenic
FLWHVRKRV	HLA-A0201	Mus	non-immunogenic
FLWLLWPVTL	HLA-A0201	Mus	non-immunogenic
FLWSVFMLI	HLA-A0201	Homo	immunogenic
FLWSVFWLI	HLA-A0201	Homo	immunogenic
FLYALALL	HLA-A0201	Homo	immunogenic
FLYALALLL	HLA-A0201	Homo	immunogenic
FLYALALLL	HLA-A0201	Mus	immunogenic
FLYELIWNV	HLA-A0201	Homo	immunogenic
FLYGALLLA	HLA-A0201	Homo	immunogenic
FLYNRPLNS	HLA-A0201	Homo	immunogenic
FLYRLFSIL	HLA-A0201	Homo	immunogenic
FLYSFFLCI	HLA-A0201	Mus	immunogenic
FMGVLVNSL	HLA-A0201	Homo	immunogenic
FMGVLVNSL	HLA-A0201	Mus	immunogenic
FMHNRLQYSL	HLA-A0201	Homo	immunogenic
FMIAFISCFA	HLA-A0201	Homo	immunogenic
FMIAFISCFA	HLA-A0201	Mus	immunogenic
FMIAFISCFA	HLA-A0202	Homo	immunogenic
FMIAFISCFA	HLA-A0203	Homo	immunogenic
FMIAFISCFA	HLA-A0206	Homo	immunogenic
FMIAFISCFA	HLA-A6802	Homo	immunogenic
FMIVSISLV	HLA-A0201	Homo	immunogenic
FMIVSISLV	HLA-A0201	Mus	immunogenic
FMIVSISLV	HLA-A0202	Homo	immunogenic
FMIVSISLV	HLA-A0203	Homo	immunogenic
FMIVSISLV	HLA-A0206	Homo	immunogenic
FMIVSISLV	HLA-A6802	Homo	immunogenic
FMKIGAHPI	H-2-Db	Mus	immunogenic
FMQEIPTFL	HLA-A0201	Mus	immunogenic
FMVFLQTHI	HLA-A0201	Homo	immunogenic
FMYEGDTPL	HLA-A0201	Homo	immunogenic
FMYMSLLGV	HLA-A0201	Homo	immunogenic
FNMLSTVLGV	HLA-A0201	Homo	immunogenic
FPHCLAFSYM	HLA-B0702	Mus	immunogenic
FPRIWLHGL	HLA-B0702	Homo	immunogenic
FPSIIYSMSI	HLA-B0702	Mus	immunogenic
FPTKDVAL	HLA-B3501	Homo	immunogenic
FPTKDVALR	HLA-A6801	Homo	immunogenic
FQDENYLYL	H-2-Db	Mus	immunogenic
FQGAWAEWPV	HLA-A0201	Homo	immunogenic
FQIVNPHLL	H-2-Db	Mus	immunogenic
FQLCNSYDL	H-2-Db	Mus	immunogenic
FQMLVAHFLV	HLA-A0201	Homo	immunogenic
FQPQNGQFI	H-2-Db	Mus	immunogenic
FQPQNGQLI	H-2-Db	Mus	immunogenic
FQQLFLNTL	HLA-A0201	Homo	immunogenic
FQQPQFQYL	HLA-A0201	Mus	immunogenic
FQYLLPGFVL	HLA-A0201	Mus	non-immunogenic
FRKAQIQGL	HLA-B2705	Homo	immunogenic
FSFLMENYL	H-2-Kb	Mus	immunogenic
FSHHNIIRL	H-2-Db	Mus	immunogenic
FSLSMDHSK	HLA-A1101	Mus	non-immunogenic
FSMELPSFGV	HLA-A0201	Homo	immunogenic
FSPMFEVL	H-2-Kb	Mus	immunogenic
FSVIFDRL	H-2-Kb	Mus	immunogenic
FSWSLSDPK	HLA-A1101	Mus	non-immunogenic
FTASLFLHL	HLA-A0201	Mus	immunogenic
FTDWANKQY	HLA-A0101	Homo	immunogenic
FTFSNVCESV	HLA-A0201	Mus	non-immunogenic
FTHNEYKFYV	HLA-A0201	Homo	immunogenic
FTIDFKLKY	HLA-A0101	Homo	immunogenic
FTIDFKLKY	HLA-A2601	Homo	immunogenic
FTIDFKLKY	HLA-A2902	Homo	immunogenic
FTIQNNTKL	H-2-Db	Mus	immunogenic
FTIVHDLYK	HLA-A1101	Mus	non-immunogenic
FTLVAPVSI	HLA-A0201	Homo	immunogenic
FTNFKVAYSK	HLA-A1101	Mus	non-immunogenic
FTSAVLLLL	HLA-A0201	Homo	immunogenic
FTSAVLLLV	HLA-A0201	Homo	immunogenic
FTSDYPFYV	HLA-A0201	Mus	immunogenic
FTSGLPAFV	HLA-A0201	Homo	immunogenic
FTSSFYNYV	HLA-A0201	Mus	non-immunogenic
FVANFSMEL	HLA-A0201	Homo	immunogenic
FVDTMSIYI	HLA-A0201	Mus	non-immunogenic
FVDYNFSLV	HLA-A0201	Homo	immunogenic
FVDYNFTIV	HLA-A0201	Homo	immunogenic
FVDYNFTIV	HLA-A0201	Mus	immunogenic
FVFADLRIV	HLA-A0201	Mus	non-immunogenic
FVFLVLAGR	HLA-A1101	Mus	non-immunogenic
FVFSTSFYL	HLA-A0201	Mus	immunogenic
FVIFACNFV	HLA-A0201	Homo	immunogenic
FVIFACNFV	HLA-A0201	Mus	immunogenic
FVIFACNFV	HLA-A0202	Homo	immunogenic
FVIFACNFV	HLA-A0203	Homo	immunogenic
FVIFACNFV	HLA-A0206	Homo	immunogenic
FVIFACNFV	HLA-A6802	Homo	immunogenic
FVMLEMLNY	HLA-A1101	Homo	immunogenic
FVNHRFTLV	HLA-A0201	Homo	immunogenic
FVNYDFALV	HLA-A0201	Homo	immunogenic
FVNYDFTIV	HLA-A0201	Homo	immunogenic
FVNYNFTLV	HLA-A0201	Homo	immunogenic
FVQWFVGL	H-2-Kb	Mus	immunogenic
FVSCDFTIV	HLA-A0201	Homo	immunogenic
FVSPKSVIGR	HLA-A1101	Mus	non-immunogenic
FVSPSLVSA	HLA-A0201	Homo	immunogenic
FVYLFHFM	H-2-Kb	Mus	immunogenic
FVYPSNFDV	HLA-A0201	Mus	immunogenic
FWAKHMWNF	HLA-A2402	Homo	immunogenic
FYALRGLSL	H-2-Kd	Mus	non-immunogenic
FYCKMNWFL	H-2-Kd	Mus	immunogenic
FYGMWPLLL	HLA-A2902	Homo	immunogenic
FYIQMCTEL	H-2-Kd	Mus	immunogenic
FYNEVASWL	H-2-Kd	Mus	immunogenic
FYNSTVTSL	H-2-Kd	Mus	immunogenic
FYQEAAELL	H-2-Kd	Mus	immunogenic
FYTASYSSV	H-2-Kd	Mus	non-immunogenic
FYTPMSRREV	H-2-Kd	Mus	immunogenic
GAFKVPGVK	HLA-A1101	Mus	non-immunogenic
GAPINSATAM	H-2-Db	Mus	immunogenic
GCVKNFEFM	H-2-Db	Mus	immunogenic
GELDRWEKI	HLA-B4002	Homo	immunogenic
GESKSYCEL	HLA-B4001	Homo	immunogenic
GFIRSLQTI	H-2-Kd	Mus	immunogenic
GFNKLRSTL	H-2-Kd	Mus	immunogenic
GGPHAVYLL	H-2-Dd	Mus	immunogenic
GGPMNFVVL	H-2-Db	Mus	immunogenic
GICSCGAFK	HLA-A1101	Mus	immunogenic
GICSCGLYK	HLA-A1101	Mus	immunogenic
GIIYIIYKL	HLA-A0201	Homo	immunogenic
GILCPTLPK	HLA-A1101	Mus	immunogenic
GILGFVFLT	HLA-A0201	Homo	immunogenic
GILGFVFTKL	HLA-A0201	Mus	immunogenic
GILGFVFTL	HLA-A0201	Homo	immunogenic
GILGFVFTL	HLA-A0201	Mus	immunogenic
GILGFVFTLT	HLA-A0201	Homo	immunogenic
GILGFVFTLT	HLA-A0201	Mus	immunogenic
GILTVSVAV	HLA-A0201	Homo	immunogenic
GIVCPICSQK	HLA-A1101	Homo	immunogenic
GLAAAVVAV	HLA-A0201	Homo	immunogenic
GLAAAVVAV	HLA-A0201	Mus	immunogenic
GLAAAVVAV	HLA-A0202	Homo	immunogenic
GLAAAVVAV	HLA-A0203	Homo	immunogenic
GLAAAVVAV	HLA-A0206	Homo	immunogenic
GLADAFILL	HLA-A0201	Mus	non-immunogenic
GLAGGAATA	HLA-A0201	Homo	immunogenic
GLCPHCINV	HLA-A0201	Homo	immunogenic
GLCTLVAML	HLA-A0201	Homo	immunogenic
GLCTLVAML	HLA-A0201	Mus	immunogenic
GLEALVPLAV	HLA-A0201	Homo	immunogenic
GLFDFVNFV	HLA-A0201	Mus	immunogenic
GLFGAIAGFI	HLA-A0201	Homo	immunogenic
GLFGAIAGFI	HLA-A0201	Mus	non-immunogenic
GLFGCIITSL	HLA-A0201	Mus	immunogenic
GLFGGGGGV	HLA-A0201	Homo	immunogenic
GLFPTQIQV	HLA-A0201	Homo	immunogenic
GLGWVGWLL	HLA-A0201	Homo	immunogenic
GLHCYEQLV	HLA-A0201	Homo	immunogenic
GLIDIAPHQI	HLA-A0201	Homo	immunogenic
GLIEKNIEL	HLA-A0201	Homo	immunogenic
GLIEKNIEL	HLA-A0201	Mus	immunogenic
GLIGLVTFL	HLA-A0201	Mus	immunogenic
GLIMVLSFL	HLA-A0201	Homo	immunogenic
GLLDKAVSNV	HLA-A0201	Homo	immunogenic
GLLDRLYDL	HLA-A0201	Mus	immunogenic
GLLEWIFRA	HLA-A0201	Mus	immunogenic
GLLGCIITSL	HLA-A0201	Homo	immunogenic
GLLGCIITSL	HLA-A0201	Mus	immunogenic
GLLGNVSTV	HLA-A0201	Homo	immunogenic
GLLGTLVQL	HLA-A0201	Mus	immunogenic
GLLLLGLWGT	HLA-A0201	Homo	immunogenic
GLLPFHSTL	HLA-A0201	Homo	immunogenic
GLLPFHSTL	HLA-A0201	Mus	immunogenic
GLLPSLLLLL	HLA-A0201	Homo	immunogenic
GLLQFIVFL	HLA-A0201	Mus	immunogenic
GLMNNAFEWI	HLA-A0201	Homo	immunogenic
GLMWLSYFV	HLA-A0201	Homo	immunogenic
GLMWLSYFV	HLA-A0201	Mus	immunogenic
GLNDYLHSV	HLA-A0201	Homo	immunogenic
GLNDYLHSV	HLA-A0201	Mus	immunogenic
GLQDCTMLV	HLA-A0201	Homo	immunogenic
GLQDCTMLV	HLA-A0201	Mus	immunogenic
GLSGPDIYK	HLA-A1101	Mus	non-immunogenic
GLSPTVWLSV	HLA-A0201	Homo	immunogenic
GLSPTVWLSV	HLA-A0201	Mus	immunogenic
GLSQFTHTV	HLA-A0201	Mus	immunogenic
GLSQFTQTV	HLA-A0201	Mus	immunogenic
GLSRYVARL	HLA-A0201	Homo	immunogenic
GLSRYVARL	HLA-A0201	Mus	immunogenic
GLSRYVARL	HLA-A0202	Homo	immunogenic
GLTEEIDYV	HLA-A0201	Mus	immunogenic
GLVGLVTFL	HLA-A0201	Mus	immunogenic
GLVILLVLAL	HLA-A0201	Homo	immunogenic
GLYIHYNL	H-2-Kb	Mus	immunogenic
GLYKQPGVPV	HLA-A0201	Mus	immunogenic
GLYNFATCGL	HLA-A0201	Mus	immunogenic
GLYPGLIWL	HLA-A0201	Mus	non-immunogenic
GMDSMKILK	HLA-A1101	Mus	non-immunogenic
GMFANRWII	HLA-A0201	Homo	immunogenic
GMFMIDNQK	HLA-A1101	Mus	non-immunogenic
GMFNMLSTV	HLA-A0201	Mus	immunogenic
GMGWLTIGI	HLA-A0201	Mus	non-immunogenic
GMSRIGMEV	HLA-A0201	Homo	immunogenic
GMSRIGMEV	HLA-A0201	Mus	immunogenic
GMVTTSTTL	HLA-A0201	Homo	immunogenic
GPATAQMAL	HLA-B0702	Homo	immunogenic
GPGHKARVL	HLA-B0702	Homo	immunogenic
GPHETITAL	HLA-B0702	Homo	immunogenic
GPKVKRPPI	HLA-B0801	Homo	immunogenic
GPRLGVRAT	HLA-B0702	Homo	immunogenic
GQTEPIAFV	HLA-A0201	Homo	immunogenic
GSLNITTLR	HLA-A1101	Mus	immunogenic
GSYLNESDFR	HLA-A1101	Mus	non-immunogenic
GSYLNVSDFR	HLA-A1101	Mus	non-immunogenic
GTHVLLPFY	HLA-A3002	Homo	immunogenic
GTIAGGVCYY	HLA-A0301	Homo	immunogenic
GTIAGGVCYY	HLA-A1101	Homo	immunogenic
GTLGIVCPI	HLA-A0201	Homo	immunogenic
GTSGSPIIDK	HLA-A1101	Homo	immunogenic
GTSGSPIINR	HLA-A1101	Homo	immunogenic
GTSGSPIVDK	HLA-A1101	Homo	immunogenic
GTSGSPIVDR	HLA-A1101	Homo	immunogenic
GTSGSPIVNR	HLA-A1101	Homo	immunogenic
GTYHFTKL	H-2-Kb	Mus	immunogenic
GVAGALVAFK	HLA-A0301	Homo	immunogenic
GVAGALVAFK	HLA-A1101	Homo	immunogenic
GVPYCNYSK	HLA-A1101	Mus	non-immunogenic
GVSENIFLK	HLA-A0301	Homo	immunogenic
GVTSSGAIYK	HLA-A1101	Homo	immunogenic
GVYQFKSV	H-2-Kb	Mus	immunogenic
GYAGTLQSL	H-2-Kd	Mus	immunogenic
GYAKMTSDL	H-2-Kd	Mus	immunogenic
GYAQTDCVL	H-2-Kd	Mus	non-immunogenic
GYCLTKWMI	H-2-Kd	Mus	immunogenic
GYIDDNQSI	H-2-Kd	Mus	immunogenic
GYISTRVEM	H-2-Kd	Mus	immunogenic
GYKDGNEYI	H-2-Kd	Mus	immunogenic
GYNKAMGFL	H-2-Kd	Mus	immunogenic
GYVSGWGRV	H-2-Kd	Mus	immunogenic
HEYPVGSQL	H-2-Kk	Mus	immunogenic
HFSKCGFPF	HLA-A2402	Homo	immunogenic
HGIRNASFI	H-2-Db	Mus	immunogenic
HGPSLYRTF	H-2-Dd	Mus	immunogenic
HHIWQNLL	HLA-B3901	Homo	immunogenic
HIFYQLANV	HLA-A0201	Mus	immunogenic
HLAFQLSSI	HLA-A0201	Homo	immunogenic
HLCGSHLVEA	HLA-A0201	Mus	immunogenic
HLDDVGFLV	HLA-A0201	Homo	immunogenic
HLFYSAVLL	HLA-A0201	Homo	immunogenic
HLLTSPKPSL	HLA-A0201	Homo	immunogenic
HLSLRGLFV	HLA-A0201	Mus	immunogenic
HLSLRGLPV	HLA-A0201	Homo	immunogenic
HLSLRGLPV	HLA-A0201	Mus	immunogenic
HLTENNLYI	HLA-A0201	Mus	non-immunogenic
HLVEALYLV	HLA-A0201	Homo	immunogenic
HLVEALYLV	HLA-A0201	Mus	immunogenic
HMWNFISGI	HLA-A0201	Homo	immunogenic
HMWNFISGI	HLA-A0201	Mus	immunogenic
HMWNFITGI	HLA-A0201	Mus	immunogenic
HMYFTFFDV	HLA-A0201	Mus	immunogenic
HNTQYCNL	H-2-Kb	Mus	immunogenic
HPAAMPHLL	HLA-B0702	Mus	non-immunogenic
HPFALLLVL	HLA-B3501	Homo	immunogenic
HPGSVNEFDF	H-2-Ld	Mus	immunogenic
HPNIEEVAL	HLA-B3501	Homo	immunogenic
HPRHYATVM	HLA-B0702	Homo	immunogenic
HPSGYIREA	HLA-B0702	Mus	immunogenic
HPSGYIREAL	HLA-B0702	Mus	immunogenic
HPTFTSQY	HLA-B3501	Homo	immunogenic
HPVGEADYF	HLA-B3501	Homo	immunogenic
HPVGEADYF	HLA-B5301	Homo	immunogenic
HPVHAGPIA	HLA-B0702	Homo	immunogenic
HPVHAGPIA	HLA-B0702	Mus	non-immunogenic
HRCQAIRK	HLA-B2705	Homo	immunogenic
HRFLPLKTR	HLA-B2705	Homo	immunogenic
HRFLPVKTR	HLA-B2705	Homo	immunogenic
HRFLPVRTR	HLA-B2705	Homo	immunogenic
HSMTNAVTI	H-2-Db	Mus	immunogenic
HSSEFCDMLK	HLA-A1101	Mus	non-immunogenic
HTVKTDVLK	HLA-A1101	Mus	immunogenic
HVDGKILFV	HLA-A0201	Mus	immunogenic
HVRVSQPSL	HLA-B0702	Homo	immunogenic
HYAPRPCGI	HLA-A2402	Homo	immunogenic
HYFQTRHYL	H-2-Kd	Mus	immunogenic
HYISMGTSGL	H-2-Kd	Mus	immunogenic
HYSPLILAL	H-2-Kd	Mus	immunogenic
HYSTVAKEL	H-2-Kd	Mus	immunogenic
IAFVFAEL	H-2-Kb	Mus	immunogenic
IAGNSAYEYV	HLA-A0201	Homo	immunogenic
IAHLGKPSY	HLA-B3501	Mus	non-immunogenic
IALTFLAV	H-2-Kb	Mus	immunogenic
IALYLQQNW	HLA-B5701	Homo	immunogenic
IALYLQQNW	HLA-B5801	Homo	immunogenic
IASGFVGLCR	HLA-A1101	Mus	non-immunogenic
IAVSIISILK	HLA-A1101	Mus	immunogenic
IAYERMCNI	H-2-Kb	Mus	immunogenic
ICPMYARV	H-2-Kb	Mus	immunogenic
ICWGNQLFV	HLA-A0201	Homo	immunogenic
IEDPPFNSL	HLA-B4001	Homo	immunogenic
IEELRQHLL	HLA-B4001	Homo	immunogenic
IEGGWTGMI	H-2-Kk	Mus	immunogenic
IEIKDTKEAL	HLA-B4001	Homo	immunogenic
IFFKTSSFL	H-2-Kd	Mus	immunogenic
IGISNRDFV	H-2-Db	Mus	immunogenic
IGLIYPNV	H-2-Kb	Mus	non-immunogenic
IGMFNLTFI	H-2-Db	Mus	immunogenic
IGPYIIGNI	H-2-Dd	Mus	immunogenic
IHSMNSSIL	HLA-B3901	Homo	immunogenic
IHSMNSTIL	HLA-B3901	Homo	immunogenic
IHYLFRCV	H-2-Kb	Mus	immunogenic
IIIPFIAYFV	HLA-A0201	Homo	immunogenic
IIIPFIAYFV	HLA-A0201	Mus	immunogenic
IIKGIVNLYK	HLA-A1101	Mus	immunogenic
IIKGIVNLYR	HLA-A1101	Mus	non-immunogenic
IIKGIVNVWK	HLA-A1101	Mus	non-immunogenic
IIKGLVNLYK	HLA-A1101	Mus	non-immunogenic
IIKGVVNLYK	HLA-A1101	Mus	non-immunogenic
IILKANFSV	HLA-A0201	Mus	immunogenic
IILNGSLLTL	HLA-A0201	Homo	immunogenic
IILYYYELY	H-2-Kb	Mus	immunogenic
IIMAINVFT	HLA-A0201	Mus	immunogenic
IISPFPGL	H-2-Kb	Mus	immunogenic
IISYIILFI	HLA-A0201	Mus	immunogenic
IIYTRNHEV	HLA-A0201	Mus	immunogenic
ILAADLEKL	HLA-A0201	Mus	non-immunogenic
ILAGYGAGV	HLA-A0201	Homo	immunogenic
ILAGYGAGV	HLA-A0201	Mus	immunogenic
ILARNLVPM	HLA-A0201	Homo	immunogenic
ILDDNLYKV	HLA-A0201	Homo	immunogenic
ILDDNLYKV	HLA-A0201	Mus	immunogenic
ILDEERDKV	HLA-A0201	Homo	immunogenic
ILDEERDKV	HLA-A0201	Mus	immunogenic
ILDKKVEKV	HLA-A0201	Homo	immunogenic
ILDSFDPLV	HLA-A0201	Homo	immunogenic
ILENFPRL	H-2-Kb	Mus	immunogenic
ILGFVFTL	HLA-A0201	Homo	immunogenic
ILGGWVAAQL	HLA-A0201	Mus	non-immunogenic
ILHNGAYSL	HLA-A0201	Mus	immunogenic
ILIYNGWYA	HLA-A0201	Homo	immunogenic
ILKEPVHGV	HLA-A0201	Homo	immunogenic
ILKEPVHGV	HLA-A0201	Mus	immunogenic
ILKGKFQTA	HLA-B0801	Homo	immunogenic
ILLERLDVGT	HLA-A0201	Homo	immunogenic
ILLERLDVGT	HLA-A0201	Mus	non-immunogenic
ILLLDQVLV	HLA-A0201	Mus	immunogenic
ILLMRTTWA	HLA-A0201	Homo	immunogenic
ILMHCQTTL	HLA-A0201	Homo	immunogenic
ILMHCQTTL	HLA-A0201	Mus	immunogenic
ILMIFISSFL	HLA-A0201	Homo	immunogenic
ILMIFISSFL	HLA-A0201	Mus	immunogenic
ILMNDQEVGV	HLA-A0201	Homo	immunogenic
ILMWEAVTL	HLA-A0201	Homo	immunogenic
ILMWEAVTL	HLA-A0201	Mus	immunogenic
ILMWEAVTV	HLA-A0201	Mus	immunogenic
ILPDKIDGL	HLA-A0201	Mus	non-immunogenic
ILPGQDLQYV	HLA-A0201	Homo	immunogenic
ILPGQDLQYV	HLA-A0201	Mus	immunogenic
ILPVIFLSI	HLA-A0201	Mus	non-immunogenic
ILQDMRNTI	H-2-Kd	Mus	immunogenic
ILQYDLWNV	HLA-A0201	Homo	immunogenic
ILRGSVAHK	HLA-A0301	Homo	immunogenic
ILSCIFAFI	HLA-A0201	Mus	immunogenic
ILSDENYLL	HLA-A0201	Homo	immunogenic
ILSNKLLYA	HLA-A0201	Mus	immunogenic
ILSPFLPL	H-2-Kb	Mus	immunogenic
ILSPFLPLL	HLA-A0201	Mus	immunogenic
ILSVSSFLFV	HLA-A0201	Homo	immunogenic
ILTDFSVIK	HLA-A1101	Homo	immunogenic
ILWFFNAMVL	HLA-A0201	Mus	immunogenic
ILYISFYFI	HLA-A0201	Homo	immunogenic
IMIGHLVGV	HLA-A0201	Homo	immunogenic
IMIGVLVGV	HLA-A0201	Homo	immunogenic
IMIKFNRL	H-2-Kb	Mus	immunogenic
IMLNGIMYRL	HLA-A0201	Mus	immunogenic
IMLSNSHSLK	HLA-A1101	Mus	non-immunogenic
IMMGVLVGV	HLA-A0201	Homo	immunogenic
IMREFNSYK	HLA-A0301	Homo	immunogenic
IMTSYQYLI	HLA-A0201	Mus	immunogenic
IMYNYPAML	H-2-Kb	Mus	immunogenic
IMYTYFSNTI	HLA-A0201	Mus	immunogenic
INFDFNTI	H-2-Kb	Mus	immunogenic
INFEFVCL	H-2-Kb	Mus	immunogenic
INVAFNRFL	H-2-Kb	Mus	immunogenic
INVEYRFL	H-2-Kb	Mus	immunogenic
INYCIGVIF	H-2-Kb	Mus	immunogenic
INYLVPFL	H-2-Kb	Mus	immunogenic
IPAAAGRFF	H-2-Ld	Mus	immunogenic
IPAALIILL	H-2-Ld	Mus	immunogenic
IPASGGNAL	H-2-Ld	Mus	immunogenic
IPDREVLY	HLA-B3501	Homo	immunogenic
IPFIAYFVL	H-2-Ld	Mus	immunogenic
IPFYGKAI	HLA-B0702	Mus	non-immunogenic
IPIILKALY	HLA-B3501	Homo	immunogenic
IPIPSSWAF	HLA-B0702	Mus	immunogenic
IPIVSVASL	H-2-Ld	Mus	non-immunogenic
IPKSAKLFF	H-2-Ld	Mus	immunogenic
IPLKIVRFF	H-2-Ld	Mus	immunogenic
IPLKYIVL	H-2-Kb	Mus	immunogenic
IPLKYIVLM	HLA-B0702	Homo	immunogenic
IPLPKQFQPY	HLA-B3501	Mus	non-immunogenic
IPMFNKGHF	H-2-Ld	Mus	immunogenic
IPMSIISFF	H-2-Ld	Mus	immunogenic
IPQCRLTPL	HLA-B0702	Homo	immunogenic
IPQYGYLTL	H-2-Ld	Mus	immunogenic
IPRHIFYQL	HLA-B0702	Mus	immunogenic
IPRRIRQGL	HLA-B0702	Homo	immunogenic
IPSINVHHY	HLA-B3501	Homo	immunogenic
IPVIVADDL	H-2-Ld	Mus	immunogenic
IPVIVADDL	HLA-B3501	Homo	immunogenic
IPYTAAVQV	HLA-B0702	Homo	immunogenic
IRHENRMVL	HLA-B3901	Homo	immunogenic
IRMFKILPL	HLA-B2705	Homo	immunogenic
IRMFKILPL	HLA-B2705	Mus	immunogenic
IRSSVQNKL	HLA-B2705	Homo	immunogenic
IRSSVQNKL	HLA-B2705	Mus	immunogenic
ISARGQELF	HLA-B5701	Homo	immunogenic
ISARGQELF	HLA-B5801	Homo	immunogenic
ISFIYALWI	H-2-Kb	Mus	non-immunogenic
ISFLKGAEL	H-2-Kb	Mus	immunogenic
ISGCYIHFFR	HLA-A1101	Mus	non-immunogenic
ISHNFCNL	H-2-Kb	Mus	immunogenic
ISIFLHLIK	HLA-A1101	Mus	immunogenic
ISIFLHLVK	HLA-A1101	Mus	immunogenic
ISPLMVAYM	H-2-Db	Mus	immunogenic
ISPLMVAYM	H-2-Kb	Mus	immunogenic
ISPRTLNAW	HLA-B5701	Homo	immunogenic
ISSIIRNLPK	HLA-A1101	Mus	non-immunogenic
ISSIIRSLPK	HLA-A1101	Mus	immunogenic
ISSLFGQRI	H-2-Kb	Mus	immunogenic
ISSVIRNLPK	HLA-A1101	Mus	non-immunogenic
ISVANKIYM	H-2-Db	Mus	immunogenic
ISVANKIYM	H-2-Kb	Mus	immunogenic
ISYEPSTL	H-2-Kb	Mus	immunogenic
ITAEGKCYK	HLA-A0301	Homo	immunogenic
ITAEGKCYK	HLA-A1101	Homo	immunogenic
ITATIEGRK	HLA-A0301	Homo	immunogenic
ITIQYNLT	H-2-Kb	Mus	immunogenic
ITLAADLEK	HLA-A1101	Mus	non-immunogenic
ITMGSLFFV	HLA-A0201	Homo	immunogenic
ITMGSLFFV	HLA-A0201	Mus	immunogenic
ITMGSLFFV	HLA-A0202	Homo	immunogenic
ITMGSLFFV	HLA-A0203	Homo	immunogenic
ITMGSLFFV	HLA-A0206	Homo	immunogenic
ITMGSLFFV	HLA-A6802	Homo	immunogenic
ITSMWPLL	H-2-Kb	Mus	immunogenic
ITYAVATL	H-2-Kb	Mus	immunogenic
ITYFFEMI	H-2-Kb	Mus	immunogenic
ITYRFYLI	H-2-Kb	Mus	immunogenic
IVFLLLAGR	HLA-A1101	Mus	non-immunogenic
IVFNLPVSK	HLA-A0301	Homo	immunogenic
IVIDEILFK	HLA-A0301	Homo	immunogenic
IVIDEILFK	HLA-A1101	Homo	immunogenic
IVLPEKDSW	HLA-B5701	Homo	immunogenic
IVLPEKDSW	HLA-B5801	Homo	immunogenic
IVSPFIPL	H-2-Kb	Mus	immunogenic
IVSPFIPLL	HLA-A0201	Mus	immunogenic
IVTDFSVIK	HLA-A1101	Homo	immunogenic
IVTDFSVIR	HLA-A1101	Homo	immunogenic
IVTDYSVIK	HLA-A1101	Homo	immunogenic
IVYAEKIPR	HLA-A0301	Homo	immunogenic
IVYAEKIPR	HLA-A1101	Homo	immunogenic
IYAGSLSAL	H-2-Kd	Mus	immunogenic
IYATVAGSL	H-2-Kd	Mus	immunogenic
IYFPLWFQL	H-2-Kd	Mus	immunogenic
IYLIINYTI	H-2-Kd	Mus	immunogenic
IYNRNIVNRL	H-2-Kd	Mus	immunogenic
IYNRNTVNRL	H-2-Kd	Mus	immunogenic
IYNVGQVSI	H-2-Kd	Mus	immunogenic
IYQKANTFL	H-2-Kd	Mus	immunogenic
IYQSAAGSL	H-2-Kd	Mus	non-immunogenic
IYSPSNHHI	H-2-Kd	Mus	immunogenic
IYSTVASSL	H-2-Kd	Mus	immunogenic
IYTSSMEAI	H-2-Kd	Mus	immunogenic
IYVGNGQMI	H-2-Kd	Mus	immunogenic
IYVKTSSFL	H-2-Kd	Mus	immunogenic
IYYVDANASI	H-2-Kd	Mus	immunogenic
KAFQDVLYV	HLA-A0201	Homo	immunogenic
KAGYNFATM	H-2-Db	Mus	immunogenic
KALYNFATM	H-2-Kb	Mus	immunogenic
KAPDNRDTL	H-2-Db	Mus	immunogenic
KAPDNRETL	H-2-Db	Mus	immunogenic
KARAKKDEL	HLA-B0702	Homo	immunogenic
KARDHLAVL	HLA-B0702	Homo	immunogenic
KAVFNFATM	H-2-Db	Mus	immunogenic
KAVGNFATM	H-2-Kb	Mus	immunogenic
KAVYNFATA	H-2-Db	Mus	immunogenic
KAVYNFATM	H-2-Db	Mus	immunogenic
KAVYNFATM	H-2-Kb	Mus	immunogenic
KEKGGLEGL	HLA-B4001	Homo	immunogenic
KEVNSQLSL	HLA-B4001	Homo	immunogenic
KFINGASTM	H-2-Kd	Mus	immunogenic
KFMLNVSYL	H-2-Db	Mus	immunogenic
KFPPALPIW	HLA-A2402	Homo	immunogenic
KGFWYAHI	H-2-Kb	Mus	immunogenic
KGQASRAVI	H-2-Kd	Mus	non-immunogenic
KIDYYIPYV	HLA-A0201	Homo	immunogenic
KIDYYIPYV	HLA-A0201	Mus	immunogenic
KIIETYLGRV	HLA-A0201	Mus	non-immunogenic
KILAESINK	HLA-A1101	Mus	immunogenic
KILSVFFLA	HLA-A0201	Homo	immunogenic
KITLFVIVPV	HLA-A0201	Mus	immunogenic
KLAGGVAVI	HLA-A0201	Homo	immunogenic
KLAGGVAVI	HLA-A0201	Mus	immunogenic
KLAKLIIDL	HLA-A0201	Homo	immunogenic
KLCTFSFLI	HLA-A0201	Homo	immunogenic
KLEDENPWL	HLA-A0201	Homo	immunogenic
KLEDENPWL	HLA-A0201	Mus	immunogenic
KLESMGIYQI	HLA-A0201	Mus	non-immunogenic
KLFDIHGRK	HLA-A1101	Mus	immunogenic
KLFTHDIML	HLA-A0201	Mus	immunogenic
KLIANNTRV	HLA-A0201	Homo	immunogenic
KLIETYFSK	HLA-A0301	Homo	immunogenic
KLILALLTFL	HLA-A0201	Mus	immunogenic
KLIVTPAAL	HLA-A0201	Homo	immunogenic
KLKIISNDYK	HLA-A0301	Homo	immunogenic
KLLMVLMLA	HLA-A0201	Homo	immunogenic
KLLRYYTEI	HLA-A0201	Homo	immunogenic
KLLSSGAFSA	HLA-A0201	Homo	immunogenic
KLLTESVNSV	HLA-A0201	Mus	immunogenic
KLLWFLTGT	HLA-A0201	Mus	immunogenic
KLMLDIHTV	HLA-A0201	Homo	immunogenic
KLMPNITLL	HLA-A0201	Homo	immunogenic
KLMPNITLL	HLA-A0201	Mus	immunogenic
KLMPPDRTAV	HLA-A0201	Homo	immunogenic
KLNGAMVEY	HLA-A0301	Homo	immunogenic
KLNKMTVEL	HLA-A0201	Mus	immunogenic
KLPDDFMGCV	HLA-A0201	Homo	immunogenic
KLPDDFMGCV	HLA-A0201	Mus	immunogenic
KLPDLCTEL	HLA-A0201	Homo	immunogenic
KLPQLCTEL	HLA-A0201	Homo	immunogenic
KLQDCTMLV	HLA-A0201	Mus	immunogenic
KLQEALSQL	HLA-A0201	Mus	immunogenic
KLQERLAKL	HLA-A0201	Homo	immunogenic
KLQVFLIVL	HLA-A0201	Homo	immunogenic
KLSCAVHLI	HLA-A0201	Mus	immunogenic
KLSEDEETEV	HLA-A0201	Mus	non-immunogenic
KLSEGDLLA	HLA-A0201	Homo	immunogenic
KLSGLGINAV	HLA-A0201	Homo	immunogenic
KLSGLGLNAI	HLA-A0201	Homo	immunogenic
KLSGLGLNAV	HLA-A0201	Homo	immunogenic
KLSSLGLNAV	HLA-A0201	Homo	immunogenic
KLTALGVNAV	HLA-A0201	Homo	immunogenic
KLTEAITAA	HLA-A0201	Mus	immunogenic
KLTGLGLNAV	HLA-A0201	Mus	immunogenic
KLTNTGLYNL	HLA-A0201	Homo	immunogenic
KLTPLCVTL	HLA-A0201	Homo	immunogenic
KLTQINFNM	HLA-A0201	Homo	immunogenic
KLVALGINAV	HLA-A0201	Homo	immunogenic
KLVALGINAV	HLA-A0201	Mus	immunogenic
KLVALGVNAV	HLA-A0201	Homo	immunogenic
KLVAMGINAV	HLA-A0201	Homo	immunogenic
KLVAMGVNAV	HLA-A0201	Homo	immunogenic
KLVANNTRL	HLA-A0201	Homo	immunogenic
KLVANNTRL	HLA-A0201	Mus	immunogenic
KLVETYISK	HLA-A0301	Homo	immunogenic
KLVGLGLNAV	HLA-A0201	Homo	immunogenic
KLVVLGINAV	HLA-A0201	Homo	immunogenic
KLWCRHFCV	HLA-A0201	Homo	immunogenic
KLWCRHFCV	HLA-A0201	Mus	immunogenic
KLWCRHFCVL	HLA-A0201	Homo	immunogenic
KLWESPQEI	HLA-A0201	Homo	immunogenic
KLYCSYEVA	HLA-A0201	Homo	immunogenic
KMAAFPETL	HLA-A0201	Homo	immunogenic
KMAEIRAHL	HLA-A0201	Mus	immunogenic
KMNIQFTAV	HLA-A0201	Mus	non-immunogenic
KMRRIFGVFK	HLA-A1101	Mus	non-immunogenic
KMSSAVGFV	HLA-A0201	Homo	immunogenic
KNYIFEEKL	H-2-Kb	Mus	immunogenic
KPAVGVYHIV	HLA-B0702	Homo	immunogenic
KPFNNILNL	HLA-B0702	Mus	immunogenic
KPIVQYDNF	HLA-B5301	Homo	immunogenic
KPKPAVRFAI	HLA-B0702	Homo	immunogenic
KQMIKSRTLK	HLA-A1101	Mus	non-immunogenic
KRLAETLAL	HLA-B2705	Mus	immunogenic
KRWIILGLNK	HLA-B2705	Homo	immunogenic
KRYGPALSI	HLA-B2705	Mus	immunogenic
KSFKDILPK	HLA-A1101	Homo	immunogenic
KSFLWTQSLR	HLA-A1101	Mus	immunogenic
KSFQWTQALR	HLA-A1101	Mus	non-immunogenic
KSIQKNPIFK	HLA-A1101	Mus	immunogenic
KSIQKNTIFK	HLA-A1101	Mus	immunogenic
KSKKIPMGF	HLA-B5701	Homo	immunogenic
KSKKTPMGF	HLA-B5701	Homo	immunogenic
KSLTYYKL	H-2-Kb	Mus	immunogenic
KSMGSKCVR	HLA-A1101	Mus	non-immunogenic
KSNQKNMFLK	HLA-A1101	Mus	immunogenic
KSPWFTTL	H-2-Kb	Mus	immunogenic
KSSFYRNL	H-2-Kb	Mus	non-immunogenic
KSSQRDTILK	HLA-A1101	Mus	immunogenic
KSVQRNTVFK	HLA-A1101	Mus	immunogenic
KSYFTNAALR	HLA-A1101	Mus	non-immunogenic
KSYNYMLL	H-2-Kb	Mus	immunogenic
KTGMHHLYR	HLA-A1101	Mus	non-immunogenic
KTKNFTIDFK	HLA-A0301	Homo	immunogenic
KTLVLVPL	H-2-Kb	Mus	non-immunogenic
KTSERSQPR	HLA-A0301	Homo	immunogenic
KTSSVARLR	HLA-A1101	Mus	immunogenic
KTTLSIKKK	HLA-A1101	Mus	non-immunogenic
KTWADEYLCV	HLA-A0201	Homo	immunogenic
KVAEIVHFL	HLA-A0201	Homo	immunogenic
KVAELVHFL	HLA-A0201	Homo	immunogenic
KVAELVWFL	HLA-A0201	Homo	immunogenic
KVASVQRMMR	HLA-A1101	Mus	immunogenic
KVCLRLLSK	HLA-A1101	Homo	immunogenic
KVDDTFYYV	HLA-A0201	Homo	immunogenic
KVDDTFYYV	HLA-A0201	Mus	immunogenic
KVEDPFYWV	HLA-A0201	Mus	immunogenic
KVFEESEYFR	HLA-A1101	Mus	non-immunogenic
KVFFGPIYYL	HLA-A0201	Mus	non-immunogenic
KVFSFWLL	H-2-Kb	Mus	immunogenic
KVGNFTGLY	HLA-A0301	Homo	immunogenic
KVGNFTGLY	HLA-A1101	Homo	immunogenic
KVLHVTDTNK	HLA-A0301	Homo	immunogenic
KVMFVIRFK	HLA-A0301	Homo	immunogenic
KVPRNQDWL	H-2-Db	Mus	immunogenic
KVSPYLFNV	HLA-A0201	Mus	immunogenic
KVVSLVILA	HLA-A0201	Homo	immunogenic
KWCANPDWI	H-2-Kd	Mus	immunogenic
KWMLISSELK	HLA-A1101	Mus	non-immunogenic
KYAAAVAGL	H-2-Kd	Mus	immunogenic
KYAANYTKI	H-2-Kd	Mus	immunogenic
KYFFTVSNI	H-2-Kd	Mus	immunogenic
KYFYGEIAL	H-2-Kd	Mus	immunogenic
KYGRLFNEI	H-2-Kd	Mus	immunogenic
KYGVSVQDI	H-2-Kd	Mus	immunogenic
KYIGLFIYI	H-2-Kd	Mus	immunogenic
KYKEAKEWL	H-2-Kd	Mus	immunogenic
KYKLKHIVW	HLA-A2402	Homo	immunogenic
KYKNAVTEL	H-2-Kd	Mus	immunogenic
KYKPVYSYV	H-2-Kd	Mus	immunogenic
KYLATASTM	HLA-A2402	Homo	immunogenic
KYLGPFNGL	H-2-Kd	Mus	immunogenic
KYLVGFGRV	H-2-Kd	Mus	immunogenic
KYMWCYSQV	H-2-Kd	Mus	immunogenic
KYNIANWFL	H-2-Kd	Mus	immunogenic
KYNKAAWFL	H-2-Kd	Mus	immunogenic
KYNKANAFL	H-2-Kd	Mus	immunogenic
KYNKANVFL	H-2-Kd	Mus	immunogenic
KYNKANWAL	H-2-Kd	Mus	immunogenic
KYNKANWFL	H-2-Kd	Mus	immunogenic
KYNKNGNFL	H-2-Kd	Mus	immunogenic
KYQKSAEAI	H-2-Kd	Mus	non-immunogenic
KYQQDRDTL	H-2-Kd	Mus	immunogenic
KYTDRKWCF	HLA-A2402	Homo	immunogenic
KYTFWEVNL	HLA-A2402	Homo	immunogenic
KYTFWEVNL	HLA-A2402	Mus	immunogenic
KYTSFPWLL	HLA-A2402	Homo	immunogenic
KYTSFPWLL	HLA-A2402	Mus	immunogenic
KYVEYGSL	H-2-Kb	Mus	immunogenic
KYYKNSQFL	H-2-Kd	Mus	immunogenic
KYYKTSNFL	H-2-Kd	Mus	immunogenic
KYYYSNSYL	H-2-Kd	Mus	immunogenic
LAIRNDEEL	H-2-Db	Mus	immunogenic
LALLSIWYI	H-2-Db	Mus	immunogenic
LALYQPANK	HLA-A1101	Mus	non-immunogenic
LALYQPVNK	HLA-A1101	Mus	non-immunogenic
LCLTYSYL	H-2-Kb	Mus	immunogenic
LFGYPVYVF	HLA-A2402	Homo	immunogenic
LFPEFSEL	H-2-Kb	Mus	non-immunogenic
LGFGAYMSK	HLA-A0301	Homo	immunogenic
LGMGNRDFI	H-2-Db	Mus	immunogenic
LGMSNRDFL	H-2-Db	Mus	immunogenic
LGPDKSGLGF	H-2-Dd	Mus	immunogenic
LGSVYYKL	H-2-Kb	Mus	immunogenic
LIALSVLAV	HLA-A0201	Mus	non-immunogenic
LIEDFDIYV	HLA-A0201	Homo	immunogenic
LIFCHSKKK	HLA-A0301	Homo	immunogenic
LIFFLTLAGR	HLA-A1101	Mus	non-immunogenic
LIFGHLPRV	HLA-A0201	Homo	immunogenic
LIISPLPRV	HLA-A0201	Homo	immunogenic
LISFYADPK	HLA-A1101	Mus	immunogenic
LISFYADPKR	HLA-A1101	Mus	non-immunogenic
LISIFLHLIK	HLA-A1101	Mus	immunogenic
LISIFLHLV	HLA-A0201	Mus	non-immunogenic
LISIFLHLVK	HLA-A1101	Mus	non-immunogenic
LIYDSSLCDL	HLA-A0201	Homo	immunogenic
LIYDSSLCDL	HLA-A0201	Mus	immunogenic
LIYKGTYEL	HLA-A0201	Mus	non-immunogenic
LIYNYPGV	H-2-Kb	Mus	immunogenic
LLACAGLAYK	HLA-A0301	Homo	immunogenic
LLAGIGTVPI	HLA-A0201	Homo	immunogenic
LLAGRSCSYK	HLA-A1101	Mus	non-immunogenic
LLALLSCLTV	HLA-A0201	Homo	immunogenic
LLALLSCLTV	HLA-A0201	Mus	non-immunogenic
LLAQFTSAI	HLA-A0201	Mus	non-immunogenic
LLAVLFVMFL	HLA-A0201	Homo	immunogenic
LLCLIFLLV	HLA-A0201	Homo	immunogenic
LLCPAGHAV	HLA-A0201	Homo	immunogenic
LLCPAGHAV	HLA-A0201	Mus	immunogenic
LLCPKSIPGL	HLA-A0201	Homo	immunogenic
LLCPSGHVV	HLA-A0201	Mus	immunogenic
LLCPTGHAV	HLA-A0201	Mus	immunogenic
LLCVLAALV	HLA-A0201	Mus	immunogenic
LLDAHIPQL	HLA-A0201	Homo	immunogenic
LLDDEAGPL	HLA-A0201	Mus	non-immunogenic
LLDEEAGPL	HLA-A0201	Mus	immunogenic
LLDEGKQSL	HLA-A0201	Homo	immunogenic
LLDFVRFMGV	HLA-A0201	Homo	immunogenic
LLDFVRMGV	HLA-A0201	Homo	immunogenic
LLDGTATLRL	HLA-A0201	Mus	non-immunogenic
LLDRDSFEV	HLA-A0201	Mus	immunogenic
LLDRDSLEV	HLA-A0201	Mus	immunogenic
LLDVAPLSL	HLA-A0201	Homo	immunogenic
LLDVAPLSL	HLA-A0201	Mus	immunogenic
LLDVPTAAV	HLA-A0201	Homo	immunogenic
LLDYQGMLPV	HLA-A0201	Homo	immunogenic
LLFEEYTNI	HLA-A0201	Homo	immunogenic
LLFGHPVYV	HLA-A0201	Homo	immunogenic
LLFGYAVYV	HLA-A0201	Homo	immunogenic
LLFGYPRYV	HLA-A0201	Homo	immunogenic
LLFGYPVAV	HLA-A0201	Homo	immunogenic
LLFGYPVYV	HLA-A0201	Homo	immunogenic
LLFGYPVYV	HLA-A0201	Mus	immunogenic
LLFLKVPA	HLA-A0201	Homo	immunogenic
LLFLLLADA	HLA-A0201	Homo	immunogenic
LLFNILGGWV	HLA-A0201	Homo	immunogenic
LLFNILGGWV	HLA-A0201	Mus	immunogenic
LLFRTLLVYL	HLA-A0201	Homo	immunogenic
LLFSFAQAV	HLA-A0201	Homo	immunogenic
LLGCIITSL	HLA-A0201	Homo	immunogenic
LLGLWGLATA	HLA-A0201	Homo	immunogenic
LLGLWGTAAL	HLA-A0201	Homo	immunogenic
LLGLWVFAAL	HLA-A0201	Homo	immunogenic
LLGRDSFEV	HLA-A0201	Mus	immunogenic
LLGRNSFEV	HLA-A0201	Homo	immunogenic
LLGRNSFEV	HLA-A0201	Mus	non-immunogenic
LLGTFTWTL	HLA-A0201	Mus	immunogenic
LLHGLDFSEV	HLA-A0201	Mus	non-immunogenic
LLHRDSFEV	HLA-A0201	Mus	immunogenic
LLHTDFEQV	HLA-A0201	Homo	immunogenic
LLIADNPQL	HLA-A0201	Homo	immunogenic
LLIDPTSGL	HLA-A0201	Homo	immunogenic
LLIKKLPRV	HLA-A0201	Homo	immunogenic
LLIKTLSPA	HLA-A0201	Mus	immunogenic
LLIRCINCQK	HLA-A1101	Homo	immunogenic
LLLDRLNQL	HLA-A0201	Homo	immunogenic
LLLDRLNQL	HLA-A0201	Mus	immunogenic
LLLEVEQEI	HLA-A0201	Mus	non-immunogenic
LLLGLMILL	HLA-A0201	Homo	immunogenic
LLLGLWGFA	HLA-A0201	Homo	immunogenic
LLLGLWGTAA	HLA-A0201	Homo	immunogenic
LLLGTLNIV	HLA-A0201	Homo	immunogenic
LLLIALWNL	HLA-A0201	Homo	immunogenic
LLLIALWNL	HLA-A0201	Mus	immunogenic
LLLIWFRPV	HLA-A0201	Homo	immunogenic
LLLKATLCI	HLA-A0201	Homo	immunogenic
LLLKATLCI	HLA-A0201	Mus	immunogenic
LLLLDVAPL	HLA-A0201	Homo	immunogenic
LLLLDVAPL	HLA-A0201	Mus	immunogenic
LLLMRTSWA	HLA-A0201	Homo	immunogenic
LLLMRTTWA	HLA-A0201	Homo	immunogenic
LLLTLLATV	HLA-A0201	Homo	immunogenic
LLLTLLATV	HLA-A0201	Mus	immunogenic
LLMDALKLSI	HLA-A0201	Mus	non-immunogenic
LLMGTLGIV	HLA-A0201	Homo	immunogenic
LLMGTLGIV	HLA-A0201	Mus	immunogenic
LLMPAGVPL	HLA-A0201	Homo	immunogenic
LLMPAGVPLT	HLA-A0201	Homo	immunogenic
LLMWEAVTV	HLA-A0201	Mus	immunogenic
LLNCAVTKL	HLA-A0201	Homo	immunogenic
LLNGWRWRL	HLA-A0201	Homo	immunogenic
LLNYILKSV	HLA-A0201	Homo	immunogenic
LLPDALLFTL	HLA-A0201	Mus	immunogenic
LLPPLLEHL	HLA-A0201	Homo	immunogenic
LLQEYNWEL	HLA-A0201	Homo	immunogenic
LLQEYNWEL	HLA-A0201	Mus	immunogenic
LLSERLNWL	HLA-A0201	Mus	immunogenic
LLSGLDFAK	HLA-A1101	Mus	immunogenic
LLSSGAFSA	HLA-A0201	Homo	immunogenic
LLSSNLSWL	HLA-A0201	Mus	non-immunogenic
LLVALAIGCV	HLA-A0201	Homo	immunogenic
LLVDLLWLL	HLA-A0201	Homo	immunogenic
LLVDLLWLL	HLA-A0201	Mus	immunogenic
LLVHFLPLL	HLA-A0201	Mus	immunogenic
LLVLFIVYV	HLA-A0201	Homo	immunogenic
LLVSEIDWL	HLA-A0201	Homo	immunogenic
LLWFLTGTFV	HLA-A0201	Mus	immunogenic
LLWNGPMAV	HLA-A0201	Homo	immunogenic
LLWSYAMGV	HLA-A0201	Homo	immunogenic
LLWTLVVL	HLA-A0201	Homo	immunogenic
LLWTLVVLL	HLA-A0201	Homo	immunogenic
LLYAHINAL	HLA-A0201	Homo	immunogenic
LLYDGSFAV	HLA-A0201	Homo	immunogenic
LLYGGVPEV	HLA-A0201	Homo	immunogenic
LLYGYPVYV	HLA-A0201	Homo	immunogenic
LMASSPTSI	HLA-A0201	Homo	immunogenic
LMDCIMFDA	HLA-A0201	Mus	immunogenic
LMGDKSENV	HLA-A0201	Homo	immunogenic
LMGDKSENV	HLA-A0201	Mus	immunogenic
LMIGNYFSGV	HLA-A0201	Mus	immunogenic
LMIGTAAAV	HLA-A0201	Homo	immunogenic
LMIIPLINV	HLA-A0201	Homo	immunogenic
LMIMKSNQK	HLA-A1101	Mus	non-immunogenic
LMLIWYRPV	HLA-A0201	Homo	immunogenic
LMLLKNGTV	HLA-A0201	Homo	immunogenic
LMNGQQIFL	HLA-A0201	Homo	immunogenic
LMNNAFEWI	HLA-A0201	Homo	immunogenic
LMNNAFEWIV	HLA-A0201	Homo	immunogenic
LMSIISTFHL	HLA-A0201	Mus	non-immunogenic
LMSMKSIQK	HLA-A1101	Mus	non-immunogenic
LMVLMLAAL	HLA-A0201	Homo	immunogenic
LMWAKIGPV	HLA-A0201	Homo	immunogenic
LMWYELSKI	HLA-A0201	Homo	immunogenic
LMYDIINSV	H-2-Kb	Mus	immunogenic
LMYDIINSV	HLA-A0201	Mus	immunogenic
LMYIFAAL	H-2-Kb	Mus	immunogenic
LNFRFENV	H-2-Kb	Mus	immunogenic
LNIDLLWSV	HLA-A0201	Homo	immunogenic
LNIDLLWSV	HLA-A0201	Mus	immunogenic
LNNSFYYMK	HLA-A1101	Mus	immunogenic
LPASLTIWF	H-2-Ld	Mus	immunogenic
LPFDKATIM	HLA-B0702	Mus	immunogenic
LPFDKPTIM	HLA-B3501	Homo	immunogenic
LPFDKSTIM	HLA-B0702	Mus	immunogenic
LPFDKSTIM	HLA-B3501	Homo	immunogenic
LPFDKSTVM	HLA-B0702	Mus	immunogenic
LPFDKTTIM	HLA-B0702	Mus	immunogenic
LPFDRPTIM	HLA-B0702	Mus	immunogenic
LPFDRTTIM	HLA-B0702	Mus	immunogenic
LPFDRTTVM	HLA-B0702	Mus	immunogenic
LPFEKSTVM	HLA-B3501	Homo	immunogenic
LPGCSFSIF	HLA-B0702	Homo	immunogenic
LPHNHTDL	HLA-B0801	Homo	immunogenic
LPKNSVMDL	H-2-Ld	Mus	immunogenic
LPLDFFPDL	H-2-Ld	Mus	immunogenic
LPLKMLNI	HLA-B5101	Homo	immunogenic
LPMDNALSI	HLA-B3501	Mus	non-immunogenic
LPNDPRPPV	HLA-B0702	Mus	immunogenic
LPNPAFIHI	H-2-Ld	Mus	immunogenic
LPQSCYLNF	H-2-Ld	Mus	immunogenic
LPRAWLQRL	HLA-B0702	Homo	immunogenic
LPRDTGPEL	HLA-B0702	Homo	immunogenic
LPRLADEDL	HLA-B0702	Mus	immunogenic
LPRPDTRHL	HLA-B0702	Mus	immunogenic
LPSDFFPSV	HLA-B0702	Mus	immunogenic
LPSDFFPSV	HLA-B5101	Homo	immunogenic
LPYIEQGMML	HLA-B3501	Homo	immunogenic
LQQRYSRL	H-2-Kb	Mus	immunogenic
LQYDLWNVV	HLA-A0201	Mus	immunogenic
LRKPKHKKL	HLA-B0801	Homo	immunogenic
LSCKSCWQK	HLA-A1101	Mus	non-immunogenic
LSCSYDHSK	HLA-A1101	Mus	immunogenic
LSHNFTLV	H-2-Kb	Mus	immunogenic
LSHSFTLV	H-2-Kb	Mus	immunogenic
LSLDVSAAFY	HLA-A0101	Mus	non-immunogenic
LSLISHVVK	HLA-A1101	Mus	non-immunogenic
LSLLLSVSNR	HLA-A1101	Mus	non-immunogenic
LSLRNPILV	H-2-Db	Mus	immunogenic
LSLVSHIVK	HLA-A1101	Mus	immunogenic
LSPPMAHL	H-2-Kb	Mus	immunogenic
LSQFTHTVK	HLA-A1101	Mus	non-immunogenic
LSVLFLQI	H-2-Kb	Mus	non-immunogenic
LSYGQAMLLK	HLA-A1101	Mus	immunogenic
LSYSAGAL	H-2-Kb	Mus	non-immunogenic
LSYSQLMTLK	HLA-A1101	Mus	immunogenic
LTAGFLIFL	HLA-A0201	Homo	immunogenic
LTAGFLIFL	HLA-A0201	Mus	immunogenic
LTAGFLIFL	HLA-A0206	Homo	immunogenic
LTCLNISSLR	HLA-A0301	Homo	immunogenic
LTCLNISSLR	HLA-A1101	Homo	immunogenic
LTFNYRNL	H-2-Kb	Mus	immunogenic
LTGQHTLPR	HLA-A1101	Mus	non-immunogenic
LTILDDNLYK	HLA-A0301	Homo	immunogenic
LTILDDNLYK	HLA-A1101	Homo	immunogenic
LTKCMSAALK	HLA-A1101	Mus	non-immunogenic
LTKRSEILK	HLA-A1101	Mus	immunogenic
LTLAADLEK	HLA-A1101	Mus	non-immunogenic
LTLDEQIFV	HLA-A0201	Mus	immunogenic
LTLLLSVSNR	HLA-A1101	Mus	non-immunogenic
LTNCTTAMLK	HLA-A1101	Mus	non-immunogenic
LTYSQLMTL	HLA-A0201	Mus	immunogenic
LTYSQLMTLK	HLA-A1101	Mus	immunogenic
LVALLACLTV	HLA-A0201	Homo	immunogenic
LVALLVCLTV	HLA-A0201	Homo	immunogenic
LVCGERGFFY	HLA-A0301	Homo	immunogenic
LVCGERGFFY	HLA-A1101	Homo	immunogenic
LVEYGTVVNK	HLA-A0301	Homo	immunogenic
LVEYGTVVNK	HLA-A1101	Homo	immunogenic
LVHTPSIDK	HLA-A0301	Homo	immunogenic
LVHTPSIDK	HLA-A1101	Homo	immunogenic
LVLFYRPI	H-2-Kb	Mus	immunogenic
LVLILYLCV	HLA-A0201	Homo	immunogenic
LVLRAVLPR	HLA-A1101	Mus	non-immunogenic
LVMAPRTVL	HLA-B0702	Homo	immunogenic
LVMAQLLRI	HLA-A0201	Homo	immunogenic
LVMLLVHYA	HLA-A0201	Homo	immunogenic
LVRAYHAMS	HLA-A3001	Homo	immunogenic
LVSFLLLAGR	HLA-A1101	Mus	immunogenic
LVSHIVKWKR	HLA-A1101	Mus	non-immunogenic
LVSRNYQML	H-2-Kb	Mus	immunogenic
LVVDFSQFSR	HLA-A1101	Homo	immunogenic
LWFHISCLTF	HLA-A2402	Mus	immunogenic
LYATVQEQL	H-2-Kd	Mus	non-immunogenic
LYEAAREAL	H-2-Kd	Mus	non-immunogenic
LYEAIEECL	H-2-Kd	Mus	non-immunogenic
LYEKVKSQL	H-2-Kd	Mus	immunogenic
LYGVSFSEL	H-2-Kd	Mus	immunogenic
LYIPGTSVI	H-2-Kd	Mus	immunogenic
LYLCCGITL	HLA-A2402	Homo	immunogenic
LYLVCGERGF	HLA-A2402	Homo	immunogenic
LYNLRRGTAL	H-2-Kd	Mus	non-immunogenic
LYPRPPGSGL	HLA-A2402	Homo	immunogenic
LYQNVGTYV	H-2-Kd	Mus	immunogenic
LYSKNLVFL	H-2-Kd	Mus	immunogenic
LYTSRMVTNL	HLA-A2402	Homo	immunogenic
LYYQGSCYI	H-2-Kd	Mus	immunogenic
MALFQPAGK	HLA-A1101	Mus	immunogenic
MALFQPANK	HLA-A1101	Mus	immunogenic
MALFQPASK	HLA-A1101	Mus	immunogenic
MALTLSPY	HLA-A2902	Homo	immunogenic
MAVPPCCIGV	HLA-A0201	Homo	immunogenic
MAWGGSYIA	HLA-A0201	Mus	non-immunogenic
MFMLIFNVK	HLA-A1101	Homo	immunogenic
MGLIYNRM	H-2-Kb	Mus	immunogenic
MGLKFRQL	H-2-Kb	Mus	immunogenic
MGYCFGGL	H-2-Kb	Mus	immunogenic
MIMQGGFSV	HLA-A0201	Homo	immunogenic
MLDDFSAGA	HLA-A0201	Mus	immunogenic
MLKLFEFNK	HLA-A1101	Mus	immunogenic
MLLALIAVL	HLA-A0201	Homo	immunogenic
MLLAVLYCL	HLA-A0201	Mus	non-immunogenic
MLLNVQTLI	HLA-A0201	Mus	immunogenic
MLLSVPLLLG	HLA-A0201	Homo	immunogenic
MLMIIIVIAI	HLA-A0201	Homo	immunogenic
MLNGIMYRL	HLA-A0201	Mus	immunogenic
MLNIPSINV	HLA-A0201	Homo	immunogenic
MLNKVKSLK	HLA-A1101	Mus	non-immunogenic
MLNNSFYYMK	HLA-A1101	Mus	immunogenic
MLNNSFYYMR	HLA-A1101	Mus	non-immunogenic
MLRLFDFNK	HLA-A1101	Mus	immunogenic
MLRLFDYNK	HLA-A1101	Mus	immunogenic
MLSNSHSLK	HLA-A1101	Mus	immunogenic
MLSRVAAVK	HLA-A0301	Homo	immunogenic
MLTFDVFRPL	HLA-A0201	Mus	immunogenic
MLVALLGAM	HLA-A0201	Homo	immunogenic
MLVGGSTLCV	HLA-A0201	Homo	immunogenic
MMCPFLFLM	HLA-A0201	Mus	immunogenic
MMCYFLTATL	HLA-A0201	Mus	non-immunogenic
MMIEEYPYV	HLA-A0201	Homo	immunogenic
MMIWHSNL	H-2-Kb	Mus	non-immunogenic
MMKTYIEFV	HLA-A0201	Mus	immunogenic
MMLVPLITV	HLA-A0201	Homo	immunogenic
MMLVPLITV	HLA-A0201	Mus	immunogenic
MMMGMFNML	HLA-A0201	Homo	immunogenic
MMQLDPSAK	HLA-A1101	Mus	non-immunogenic
MMRKLAILSV	HLA-A0201	Homo	immunogenic
MMRKLAILSV	HLA-A0201	Mus	immunogenic
MPAYIRNTL	HLA-B0702	Homo	immunogenic
MPLETQLAI	HLA-B0702	Homo	immunogenic
MPLFPTFSM	H-2-Ld	Mus	immunogenic
MPNDPNRNV	HLA-B0702	Homo	immunogenic
MPNGLIAQF	HLA-B3501	Homo	immunogenic
MPTNKKINM	HLA-B0702	Mus	immunogenic
MPVGGQSSF	H-2-Ld	Mus	immunogenic
MRDHTITLL	HLA-B2705	Homo	immunogenic
MRDHTITLL	HLA-B2705	Mus	immunogenic
MSCDFNGGK	HLA-A1101	Mus	immunogenic
MSDQSVPSFR	HLA-A1101	Mus	non-immunogenic
MSGCYIHFFR	HLA-A1101	Mus	immunogenic
MSIIFFLPL	H-2-Kb	Mus	non-immunogenic
MSLAADLEK	HLA-A1101	Mus	non-immunogenic
MSPVNKSFEI	H-2-Db	Mus	non-immunogenic
MSVPYCNYTK	HLA-A1101	Mus	immunogenic
MTMPLSCTK	HLA-A1101	Mus	immunogenic
MVFRTSTPK	HLA-A1101	Mus	immunogenic
MVFRTSTPR	HLA-A1101	Mus	immunogenic
MVGLLEWIFR	HLA-A1101	Mus	non-immunogenic
MYAAMAKAL	H-2-Kd	Mus	non-immunogenic
MYLRRFII	H-2-Kd	Mus	immunogenic
NAITNAKII	H-2-Db	Mus	immunogenic
NAIVNWDPV	H-2-Db	Mus	non-immunogenic
NASRCWVAM	HLA-B3501	Homo	immunogenic
NEGCGWAGW	HLA-B4403	Homo	immunogenic
NEGCGWMGW	HLA-B4403	Homo	immunogenic
NFINGNTFI	H-2-Kd	Mus	immunogenic
NFKFRDLLFK	HLA-A1101	Mus	non-immunogenic
NFMKTAGFI	H-2-Kd	Mus	immunogenic
NGPASSTTL	H-2-Dd	Mus	immunogenic
NGVYFVYL	H-2-Kb	Mus	immunogenic
NIAEYIAGL	HLA-A0201	Mus	immunogenic
NIALWMTEYL	HLA-A0201	Homo	immunogenic
NILPHDLIFR	HLA-A1101	Mus	non-immunogenic
NIRQAGVQY	HLA-B1502	Homo	immunogenic
NISGYNFSL	HLA-A0201	Mus	immunogenic
NLAQDLATV	HLA-A0201	Homo	immunogenic
NLATYMNSI	HLA-A0201	Homo	immunogenic
NLFDIPLLTV	HLA-A0201	Homo	immunogenic
NLFDIPLLTV	HLA-A0201	Mus	immunogenic
NLFLFLFAV	HLA-A0201	Homo	immunogenic
NLFTFLHEI	HLA-A0201	Mus	immunogenic
NLIRNRDYI	H-2-Db	Mus	immunogenic
NLMSMKSSQR	HLA-A1101	Mus	non-immunogenic
NLNESLIDL	HLA-A0201	Homo	immunogenic
NLNESLIDL	HLA-A0201	Mus	immunogenic
NLNQVIQSV	HLA-A0201	Mus	immunogenic
NLPGCSFSI	HLA-A0201	Homo	immunogenic
NLQSLTNLL	HLA-A0201	Mus	non-immunogenic
NLSDGFLLI	HLA-A0201	Mus	immunogenic
NLVPMVATV	HLA-A0201	Homo	immunogenic
NLVPMVATV	HLA-A0201	Mus	immunogenic
NLVPMVATV	HLA-A0206	Homo	immunogenic
NLWNGIVPT	HLA-A0201	Mus	immunogenic
NLYDHALMSI	HLA-A0201	Mus	immunogenic
NLYVSLLLL	HLA-A0201	Mus	non-immunogenic
NMFTPYIGV	HLA-A0201	Homo	immunogenic
NMLESILIK	HLA-A1101	Mus	immunogenic
NMTMPLSCTK	HLA-A1101	Mus	immunogenic
NMYRYPNQV	H-2-Kb	Mus	immunogenic
NPKASLLSL	HLA-B0702	Homo	immunogenic
NPLSNPFYM	H-2-Ld	Mus	immunogenic
NPRKQVPFM	HLA-B0702	Mus	immunogenic
NPRLPVCNL	HLA-B0702	Homo	immunogenic
NRAKQVIKL	HLA-B2705	Homo	immunogenic
NRFSVAYML	HLA-B2705	Homo	immunogenic
NSDLCNICWK	HLA-A1101	Mus	non-immunogenic
NSGCYIHFFR	HLA-A1101	Mus	immunogenic
NSIRNLDTI	H-2-Db	Mus	immunogenic
NSLGGCRCGK	HLA-A1101	Mus	non-immunogenic
NSMKTSSVAR	HLA-A1101	Mus	non-immunogenic
NSMVVCRTYI	H-2-Db	Mus	immunogenic
NSVCACGLFK	HLA-A1101	Mus	immunogenic
NSYLNESEFR	HLA-A1101	Mus	non-immunogenic
NSYLNISDFR	HLA-A1101	Mus	non-immunogenic
NTLHFLTRGK	HLA-A1101	Mus	non-immunogenic
NTLMKNRLK	HLA-A1101	Mus	immunogenic
NTYLRYITV	H-2-Kb	Mus	immunogenic
NTYPFLLTF	H-2-Kb	Mus	non-immunogenic
NVMLVTLPV	HLA-A0201	Homo	immunogenic
NVMPVLDQSV	HLA-A0201	Homo	immunogenic
NVTSIHSLL	HLA-A6802	Homo	immunogenic
NYADRKWCF	HLA-A2402	Homo	immunogenic
NYADRRWCF	HLA-A2402	Homo	immunogenic
NYHITLRFI	H-2-Kd	Mus	immunogenic
NYIPQQLAL	H-2-Kd	Mus	immunogenic
NYLLSWKQV	H-2-Kd	Mus	non-immunogenic
NYLVDKGAI	H-2-Kd	Mus	immunogenic
NYNGLLSSI	H-2-Kd	Mus	immunogenic
PAYIVPTY	HLA-B3501	Mus	non-immunogenic
PGPAKFSLL	H-2-Dd	Mus	immunogenic
PGPGPQPGPL	H-2-Dd	Mus	non-immunogenic
PIPYYYLPL	H-2-Kb	Mus	immunogenic
PLFDFSWLSL	HLA-A0201	Homo	immunogenic
PLFGYPVYV	HLA-A0201	Homo	immunogenic
PYIACRTSI	H-2-Kd	Mus	immunogenic
PYLFWLAAI	HLA-A2301	Homo	immunogenic
QAFTFSPTYK	HLA-A0301	Homo	immunogenic
QAFTFSPTYK	HLA-A1101	Homo	immunogenic
QAKWRLQTL	HLA-B0801	Homo	immunogenic
QASQEVKNW	HLA-B5301	Homo	immunogenic
QASQEVKNW	HLA-B5701	Homo	immunogenic
QASQEVKNW	HLA-B5801	Homo	immunogenic
QEFFWDANDI	HLA-B4403	Homo	immunogenic
QGINNLDNL	H-2-Db	Mus	immunogenic
QIFNIISYI	HLA-A0201	Mus	immunogenic
QILHMVGMRR	HLA-A1101	Mus	immunogenic
QILQIVGMRK	HLA-A1101	Mus	non-immunogenic
QILQMVGMRR	HLA-A1101	Mus	non-immunogenic
QIMYNYPAM	H-2-Kb	Mus	immunogenic
QIYFESYVR	HLA-A1101	Mus	non-immunogenic
QLCPICRAPV	HLA-A0201	Homo	immunogenic
QLFKYVPSA	HLA-A0201	Mus	immunogenic
QLFLNTLSFV	HLA-A0201	Homo	immunogenic
QLFTFSPRR	HLA-A0301	Homo	immunogenic
QLGAFLTNV	HLA-A0201	Homo	immunogenic
QLGAFLTNV	HLA-A0201	Mus	immunogenic
QLGPTCLSSL	HLA-A0201	Homo	immunogenic
QLIPCMDVVL	HLA-A0201	Homo	immunogenic
QLLKLNVPA	HLA-A0201	Homo	immunogenic
QLLMGTCTI	HLA-A0201	Mus	non-immunogenic
QLLQHYREV	HLA-A0201	Homo	immunogenic
QLPEATFMV	HLA-A0201	Homo	immunogenic
QLSMYRVFEV	HLA-A0201	Homo	immunogenic
QMARLAWEA	HLA-A0201	Homo	immunogenic
QMDYSNGLFV	HLA-A0201	Homo	immunogenic
QMIKSRTLK	HLA-A1101	Mus	immunogenic
QMSIQLINK	HLA-A1101	Mus	immunogenic
QPEWFRNVL	HLA-B0702	Mus	immunogenic
QPRAPIRPI	HLA-B0702	Homo	immunogenic
QPSLILVSQY	HLA-B3501	Homo	immunogenic
QSDTVFDYY	HLA-A0101	Homo	immunogenic
QSDTVFDYY	HLA-A3002	Homo	immunogenic
QSITRSLIY	HLA-A2902	Homo	immunogenic
QSVTLTMQR	HLA-A1101	Mus	non-immunogenic
QTFDFGRL	H-2-Kb	Mus	immunogenic
QTNFKSLLR	HLA-A0301	Homo	immunogenic
QTTPYNFIAK	HLA-A0301	Homo	immunogenic
QTTPYNFIAK	HLA-A1101	Homo	immunogenic
QTVKSDVLK	HLA-A1101	Mus	immunogenic
QVPLRPMTYK	HLA-A0301	Homo	immunogenic
QVPLRPMTYK	HLA-A1101	Homo	immunogenic
QVSLVQRILR	HLA-A1101	Mus	non-immunogenic
QVSQVQRLLR	HLA-A1101	Mus	non-immunogenic
QVYFESFVR	HLA-A1101	Mus	immunogenic
QYDPVAALF	HLA-A2402	Homo	immunogenic
QYGSVSTNL	H-2-Kd	Mus	immunogenic
QYITALNHL	H-2-Kd	Mus	immunogenic
QYIYSEHTI	H-2-Kd	Mus	immunogenic
QYNKTGYFI	H-2-Kd	Mus	immunogenic
QYSDRRWCF	HLA-A2402	Homo	immunogenic
QYSWFVNGTF	HLA-A2402	Homo	immunogenic
QYSXGRFTI	H-2-Kd	Mus	immunogenic
QYVKVYLESF	HLA-A2402	Homo	immunogenic
RAHYNIVTV	H-2-Db	Mus	immunogenic
RAIEAQQHL	HLA-B5801	Homo	immunogenic
RAITFEPL	H-2-Kb	Mus	immunogenic
RAITFSPL	H-2-Kb	Mus	immunogenic
RALAETSYV	HLA-A0201	Homo	immunogenic
RALEYKNL	H-2-Kb	Mus	immunogenic
RALIFILL	H-2-Kb	Mus	immunogenic
RAYVYQGL	H-2-Kb	Mus	immunogenic
RCYIFANI	H-2-Kb	Mus	immunogenic
RGINDRNFW	HLA-B5801	Homo	immunogenic
RGPGRAFVTI	H-2-Dd	Mus	immunogenic
RGYVYQGL	H-2-Kb	Mus	immunogenic
RIEDMFLTSV	HLA-A0201	Mus	immunogenic
RIFAELEGV	HLA-A0201	Homo	immunogenic
RIFAELEGV	HLA-A0201	Mus	immunogenic
RIIDFDNM	H-2-Kb	Mus	immunogenic
RIITFEPL	H-2-Kb	Mus	immunogenic
RIKQKGIL	HLA-B0801	Homo	immunogenic
RISRFANL	H-2-Kb	Mus	immunogenic
RIWCLVVCV	HLA-A0201	Homo	immunogenic
RLAGQFLEEL	HLA-A0201	Mus	immunogenic
RLDDDGNFQL	HLA-A0201	Homo	immunogenic
RLEEDNPWL	HLA-A0201	Mus	non-immunogenic
RLFDFNKQA	HLA-A0201	Mus	immunogenic
RLGATIWQL	HLA-A0201	Mus	immunogenic
RLGAVILFV	HLA-A0201	Mus	immunogenic
RLGVRATRK	HLA-A0301	Homo	immunogenic
RLIQNSLTI	H-2-Db	Mus	immunogenic
RLIQNSLTI	HLA-A0201	Mus	non-immunogenic
RLIVFPDLGV	HLA-A0201	Homo	immunogenic
RLIVFPDLGV	HLA-A0201	Mus	immunogenic
RLKFSLSYK	HLA-A1101	Mus	non-immunogenic
RLLCALTSL	HLA-A0201	Homo	immunogenic
RLLDLAQEGL	HLA-A0201	Homo	immunogenic
RLLDLFGPEV	HLA-A0201	Mus	immunogenic
RLLDRLVRL	HLA-A0201	Homo	immunogenic
RLLEDSKGV	HLA-A0201	Mus	immunogenic
RLLEIIWGV	HLA-A0201	Mus	immunogenic
RLLGTFTWT	HLA-A0201	Mus	immunogenic
RLLGTFTWTL	HLA-A0201	Mus	immunogenic
RLLIKKLPRV	HLA-A0201	Homo	immunogenic
RLLPLLALL	HLA-A0201	Homo	immunogenic
RLLPSLLLLL	HLA-A0201	Homo	immunogenic
RLLQTGIHV	HLA-A0201	Homo	immunogenic
RLLSPLSPL	HLA-A0201	Homo	immunogenic
RLLSPTTIV	HLA-A0201	Homo	immunogenic
RLMRTNFLI	HLA-A0201	Mus	immunogenic
RLMSMKSIQK	HLA-A1101	Mus	immunogenic
RLMSMRSVQR	HLA-A1101	Mus	non-immunogenic
RLNKRSYLI	HLA-A0201	Mus	non-immunogenic
RLNMFTPYI	HLA-A0201	Homo	immunogenic
RLPLVLPAV	HLA-A0201	Homo	immunogenic
RLRAEAQVK	HLA-A0301	Homo	immunogenic
RLRDLNQAV	HLA-A0201	Mus	non-immunogenic
RLRPGGKKK	HLA-A0301	Homo	immunogenic
RLRPGGKKK	HLA-A3001	Homo	immunogenic
RLSDNGYYTV	HLA-A0201	Homo	immunogenic
RLWHYPCTA	HLA-A0201	Homo	immunogenic
RLWHYPCTI	HLA-A0201	Homo	immunogenic
RLWHYPCTI	HLA-A0201	Mus	immunogenic
RLWHYPCTL	HLA-A0201	Homo	immunogenic
RLWHYPCTV	HLA-A0201	Homo	immunogenic
RLYDLTRYA	HLA-A0201	Mus	non-immunogenic
RLYDYFTRV	HLA-A0201	Homo	immunogenic
RLYDYFTRV	HLA-A0201	Mus	immunogenic
RLYQNPTTYI	HLA-A0201	Mus	immunogenic
RMAWGGSYI	HLA-A0201	Mus	non-immunogenic
RMFPNAPYL	HLA-A0201	Homo	immunogenic
RMILMTHFF	HLA-A2402	Homo	immunogenic
RMLINRFTM	H-2-Db	Mus	immunogenic
RMLLMEGLK	HLA-A1101	Mus	non-immunogenic
RMLPIDLLFR	HLA-A1101	Mus	non-immunogenic
RMMEYGTTMV	HLA-A0201	Homo	immunogenic
RMMEYGTTMV	HLA-A0201	Mus	immunogenic
RMNSNQVCI	H-2-Db	Mus	immunogenic
RMVLASTTAK	HLA-A0301	Homo	immunogenic
RMYVGGVEHR	HLA-A0301	Homo	immunogenic
RNIMYDHL	H-2-Kb	Mus	immunogenic
RPAASGVYL	H-2-Ld	Mus	immunogenic
RPASSGVYL	H-2-Ld	Mus	immunogenic
RPAYIVTPY	HLA-B3501	Mus	non-immunogenic
RPHERNGFTV	HLA-B0702	Homo	immunogenic
RPKHLYVSM	HLA-B0702	Homo	immunogenic
RPKHLYVSM	HLA-B0801	Homo	immunogenic
RPLAAGVYM	H-2-Ld	Mus	immunogenic
RPLSAGVYM	H-2-Ld	Mus	immunogenic
RPLSSGVYM	H-2-Ld	Mus	immunogenic
RPMSLRSTII	HLA-B0702	Homo	immunogenic
RPMTYKAAV	HLA-B0702	Homo	immunogenic
RPPIFIRLL	HLA-B0702	Homo	immunogenic
RPPIFIRRL	HLA-B0702	Homo	immunogenic
RPQAGGVYL	H-2-Ld	Mus	immunogenic
RPQASGVYM	H-2-Ld	Mus	immunogenic
RPQASGYYL	H-2-Ld	Mus	immunogenic
RPQTSGVYM	H-2-Ld	Mus	immunogenic
RPRFEHPHL	HLA-B0702	Homo	immunogenic
RPRFLSQNM	HLA-B0702	Mus	immunogenic
RPRGEVRFL	HLA-B0702	Homo	immunogenic
RPRNRYSQL	HLA-B0702	Homo	immunogenic
RPRPPARSL	HLA-B0702	Homo	immunogenic
RPSSLLISSL	HLA-B0702	Mus	immunogenic
RPSTPRAAV	HLA-B0702	Homo	immunogenic
RPSTRNFFEL	HLA-B0702	Mus	immunogenic
RPVVVVNWI	HLA-B0702	Mus	immunogenic
RQLLNLDVL	H-2-Db	Mus	immunogenic
RQVGDFHYV	HLA-A0201	Homo	immunogenic
RRAQMAPKR	HLA-B2705	Homo	immunogenic
RRATAILRK	HLA-B2705	Mus	immunogenic
RRFFPYYV	HLA-B2705	Homo	immunogenic
RRIFDLIEL	HLA-B2705	Homo	immunogenic
RRIYDLIEL	HLA-B2705	Homo	immunogenic
RRKMMYMCY	HLA-B2705	Homo	immunogenic
RRKWRRWHL	HLA-B2705	Homo	immunogenic
RRLVVTLQC	HLA-B2705	Homo	immunogenic
RRRLRTLVL	HLA-B2705	Homo	immunogenic
RRRWHRWRL	HLA-B2705	Homo	immunogenic
RRRWRRLTV	HLA-B2705	Homo	immunogenic
RRSFEIKKL	HLA-B2705	Mus	immunogenic
RRWLRLLV	HLA-B2705	Homo	immunogenic
RSCGMYGLK	HLA-A1101	Mus	immunogenic
RSFCIYGHL	H-2-Kb	Mus	immunogenic
RSFKDLLKK	HLA-A1101	Homo	immunogenic
RSFTFKEGFK	HLA-A0301	Homo	immunogenic
RSFTFKEGFK	HLA-A1101	Homo	immunogenic
RSIDFERV	H-2-Kb	Mus	immunogenic
RSMKKVDSPR	HLA-A1101	Mus	non-immunogenic
RSPWFTTL	H-2-Kb	Mus	non-immunogenic
RSYCYLAT	H-2-Kb	Mus	immunogenic
RSYIYYAL	H-2-Kb	Mus	immunogenic
RSYLIRAL	H-2-Kb	Mus	immunogenic
RTAFGGKYMR	HLA-A1101	Mus	non-immunogenic
RTAIHSLYGR	HLA-A1101	Mus	immunogenic
RTALPSLYGR	HLA-A1101	Mus	non-immunogenic
RTAPPSLYGR	HLA-A1101	Mus	immunogenic
RTFDPHFLRV	HLA-A0201	Mus	immunogenic
RTFSFQLI	H-2-Kb	Mus	immunogenic
RTLDKVLEV	HLA-A0201	Homo	immunogenic
RTLGSKCVR	HLA-A1101	Mus	non-immunogenic
RTLLGLILFV	HLA-A0201	Mus	immunogenic
RTYTYEKL	H-2-Kb	Mus	immunogenic
RVAHSSLYGR	HLA-A1101	Mus	non-immunogenic
RVCEKMALY	HLA-A0301	Homo	immunogenic
RVLLLLLLGL	HLA-A0201	Homo	immunogenic
RVNPDEFEK	HLA-A1101	Mus	immunogenic
RVRAYTYSK	HLA-A0301	Homo	immunogenic
RVRAYTYSK	HLA-A3001	Homo	immunogenic
RVSDISVLMK	HLA-A1101	Mus	immunogenic
RVSDVSVLMK	HLA-A1101	Mus	immunogenic
RVYEALYYV	HLA-A0201	Homo	immunogenic
RVYEALYYV	HLA-A0201	Mus	immunogenic
RWMCLRRFII	HLA-A2402	Mus	immunogenic
RYAPACKPL	HLA-A2402	Homo	immunogenic
RYASRMPVL	H-2-Kd	Mus	non-immunogenic
RYCINSASL	H-2-Kd	Mus	immunogenic
RYLENGKETL	H-2-Kd	Mus	immunogenic
RYLKDQQLL	HLA-A2301	Homo	immunogenic
RYLKDQQLL	HLA-A2402	Homo	immunogenic
RYLKNGKETL	H-2-Kd	Mus	immunogenic
RYLMKTENWI	H-2-Kd	Mus	non-immunogenic
RYNVIASSI	H-2-Kd	Mus	immunogenic
RYPLTFGW	HLA-A2301	Homo	immunogenic
RYPLTFGW	HLA-A2402	Homo	immunogenic
RYQKAGVML	H-2-Kd	Mus	immunogenic
RYRFAFLYLL	HLA-A2402	Homo	immunogenic
RYRGRASAL	H-2-Kd	Mus	non-immunogenic
RYSIFFDY	HLA-A2402	Homo	immunogenic
RYSIFFDYM	HLA-A2402	Homo	immunogenic
RYYDGNIYEL	HLA-A2402	Homo	immunogenic
SAALKNLCFY	HLA-A1101	Mus	non-immunogenic
SAALRNLCFY	HLA-A1101	Mus	non-immunogenic
SAAQPSAEFR	HLA-A1101	Mus	non-immunogenic
SAFEWHLTF	H-2-Kb	Mus	immunogenic
SAICSVVRR	HLA-A3101	Homo	immunogenic
SAIENYETF	H-2-Db	Mus	immunogenic
SAIENYETF	H-2-Kb	Mus	immunogenic
SAINNYAQKL	H-2-Db	Mus	immunogenic
SAITNHAAF	H-2-Db	Mus	immunogenic
SALDFHKV	H-2-Kb	Mus	immunogenic
SALQNAASI	H-2-Db	Mus	non-immunogenic
SANALSTFI	H-2-Db	Mus	immunogenic
SAPMKTVTI	H-2-Db	Mus	immunogenic
SAPMNVDNL	H-2-Db	Mus	immunogenic
SAVKNYCSKL	H-2-Db	Mus	immunogenic
SAVSNLFYA	H-2-Db	Mus	immunogenic
SAVSNLFYV	H-2-Db	Mus	immunogenic
SAVTSLAAI	H-2-Db	Mus	non-immunogenic
SCLDYSHL	H-2-Kb	Mus	immunogenic
SCLEFWQRV	H-2-Kb	Mus	immunogenic
SCLENFRAYV	H-2-Db	Mus	immunogenic
SDYEGRLI	H-2-Kk	Mus	immunogenic
SEHPTFTSQY	HLA-B4402	Homo	immunogenic
SEHPTFTSQY	HLA-B4403	Homo	immunogenic
SESSFFNLI	HLA-B4001	Homo	immunogenic
SFAVATTAL	H-2-Kd	Mus	immunogenic
SFFDRKSDAK	HLA-A1101	Homo	immunogenic
SFHSLHLLF	HLA-A2402	Homo	immunogenic
SFLTALKRFL	H-2-Kd	Mus	immunogenic
SFNNGSLFK	HLA-A1101	Mus	non-immunogenic
SFQPVIDAI	H-2-Kd	Mus	non-immunogenic
SFYRNLLWL	H-2-Db	Mus	non-immunogenic
SGCYIHFFR	HLA-A1101	Mus	immunogenic
SGPAAAVAL	H-2-Dd	Mus	immunogenic
SGPAAAVAL	H-2-Ld	Mus	non-immunogenic
SGPAAVPTL	H-2-Dd	Mus	non-immunogenic
SGPAAVPTL	H-2-Ld	Mus	non-immunogenic
SGPSNTPPEI	H-2-Db	Mus	immunogenic
SGPSQKIQLV	H-2-Dd	Mus	immunogenic
SGPSRGRII	H-2-Dd	Mus	immunogenic
SGVGNDLVL	H-2-Db	Mus	immunogenic
SHIIWVSL	H-2-Kb	Mus	immunogenic
SIFRFLNI	H-2-Kb	Mus	immunogenic
SIIAFEKL	H-2-Kb	Mus	immunogenic
SIIFFLPL	H-2-Kb	Mus	immunogenic
SIIKFEKL	H-2-Kb	Mus	immunogenic
SIINFEKL	H-2-Kb	Mus	immunogenic
SILEGIANV	HLA-A0201	Homo	immunogenic
SIMAFILGI	HLA-A0201	Mus	immunogenic
SIMAFILGII	HLA-A0201	Mus	immunogenic
SINGVMWTV	HLA-A0201	Homo	immunogenic
SIQKNPIFK	HLA-A1101	Mus	immunogenic
SIQKNTIFK	HLA-A1101	Mus	immunogenic
SITEVECFL	HLA-A0201	Homo	immunogenic
SIVAYTMSL	HLA-A0201	Homo	immunogenic
SIVAYTMSL	HLA-A0201	Mus	immunogenic
SIYQYVRL	H-2-Kb	Mus	immunogenic
SIYRYYGL	H-2-Kb	Mus	immunogenic
SIYVYALPL	HLA-A0201	Homo	immunogenic
SKIFINSII	H-2-Kd	Mus	immunogenic
SLAADLEKL	HLA-A0201	Mus	immunogenic
SLAAGVKLL	HLA-A0201	Homo	immunogenic
SLCKLNNVFY	HLA-A0301	Homo	immunogenic
SLCKLNNVFY	HLA-A1101	Homo	immunogenic
SLEEEIRFL	HLA-A0201	Homo	immunogenic
SLFDRKSDAK	HLA-A1101	Homo	immunogenic
SLFGQRIEV	HLA-A0201	Homo	immunogenic
SLFIESSICL	HLA-A0201	Mus	non-immunogenic
SLFKNVRLL	HLA-A0201	Homo	immunogenic
SLFLGILSV	HLA-A0201	Homo	immunogenic
SLFMILCTR	HLA-A0301	Homo	immunogenic
SLFMILCTR	HLA-A1101	Homo	immunogenic
SLFNTVATL	HLA-A0201	Mus	non-immunogenic
SLFPGKLEV	HLA-A0201	Mus	immunogenic
SLGEQQYSV	HLA-A0201	Homo	immunogenic
SLGLVILLVL	HLA-A0201	Homo	immunogenic
SLGLVILLVL	HLA-A0211	Homo	immunogenic
SLHTGFLASL	HLA-A0201	Homo	immunogenic
SLIDLLHKI	HLA-A0201	Homo	immunogenic
SLILIGITTL	HLA-A0201	Homo	immunogenic
SLILIGITTL	HLA-A0201	Mus	immunogenic
SLILLECFVR	HLA-A1101	Mus	non-immunogenic
SLISHVVKWK	HLA-A1101	Mus	non-immunogenic
SLLDEDSKI	HLA-A0201	Mus	non-immunogenic
SLLGQLSGQV	HLA-A0201	Homo	immunogenic
SLLLELEEV	HLA-A0201	Homo	immunogenic
SLLLSVSNR	HLA-A1101	Mus	non-immunogenic
SLLMWITQV	HLA-A0201	Homo	immunogenic
SLLNNQFGTM	H-2-Db	Mus	immunogenic
SLLPAIVEL	HLA-A0201	Homo	immunogenic
SLLSEFCRV	HLA-A0201	Homo	immunogenic
SLMAFTAAV	HLA-A0201	Homo	immunogenic
SLMAFTASI	HLA-A0201	Mus	immunogenic
SLMASSPTSI	HLA-A0201	Homo	immunogenic
SLMIMKSNQK	HLA-A1101	Mus	immunogenic
SLMSLSIEI	HLA-A0201	Mus	immunogenic
SLMSWSAIL	HLA-A0201	Homo	immunogenic
SLNFMGYVI	HLA-A0201	Mus	non-immunogenic
SLNLTIVSV	HLA-A0201	Mus	immunogenic
SLNQTVHSL	HLA-A0201	Mus	immunogenic
SLNSMYTRL	HLA-A0201	Mus	non-immunogenic
SLPFQNIHPV	HLA-A0201	Mus	non-immunogenic
SLPITVYYA	HLA-A0201	Homo	immunogenic
SLPITVYYA	HLA-A0201	Mus	immunogenic
SLQDIEITCV	HLA-A0201	Homo	immunogenic
SLQNSEFLL	HLA-A0201	Homo	immunogenic
SLRNWIATL	HLA-A0201	Homo	immunogenic
SLSAYIIRV	HLA-A0201	Homo	immunogenic
SLSAYIIRV	HLA-A0201	Mus	immunogenic
SLSEKTVLL	HLA-A0201	Mus	immunogenic
SLSHYFTLV	HLA-A0201	Homo	immunogenic
SLSPLQAEL	HLA-A0201	Homo	immunogenic
SLSRFSWGA	HLA-A0201	Homo	immunogenic
SLTMACMAK	HLA-A1101	Mus	non-immunogenic
SLTSINVQA	HLA-A0201	Homo	immunogenic
SLVEELKKV	HLA-A0201	Homo	immunogenic
SLVIVTTFV	HLA-A0201	Homo	immunogenic
SLVIVTTFV	HLA-A0201	Mus	immunogenic
SLVKPTVYV	HLA-A0201	Mus	non-immunogenic
SLVSHIVKWK	HLA-A1101	Mus	immunogenic
SLWGIRWYI	HLA-A0201	Mus	immunogenic
SLWGQPAEA	HLA-A0201	Mus	immunogenic
SLWGSGLLML	HLA-A0201	Homo	immunogenic
SLWKDGAPL	HLA-A0201	Homo	immunogenic
SLYADSPSV	HLA-A0201	Homo	immunogenic
SLYADSPSV	HLA-A0201	Mus	immunogenic
SLYFGGICV	HLA-A0201	Homo	immunogenic
SLYHVYEVNL	HLA-A0201	Homo	immunogenic
SLYHVYEVNL	HLA-A0201	Mus	immunogenic
SLYKGVYEL	HLA-A0201	Mus	immunogenic
SLYNTIAVL	HLA-A0201	Homo	immunogenic
SLYNTVATL	HLA-A0201	Homo	immunogenic
SMAERFKTK	HLA-A1101	Mus	non-immunogenic
SMHFYGWSL	HLA-A0201	Homo	immunogenic
SMIEAESSV	HLA-A0201	Homo	non-immunogenic
SMIENLEYM	H-2-Db	Mus	immunogenic
SMKTSFSSR	HLA-A1101	Mus	non-immunogenic
SMKTSSTVK	HLA-A1101	Mus	non-immunogenic
SMLNKVKSLK	HLA-A1101	Mus	non-immunogenic
SMMNITRLEV	HLA-A0201	Mus	immunogenic
SMMQLDPSAK	HLA-A1101	Mus	non-immunogenic
SMMSMYGKA	HLA-A0201	Mus	non-immunogenic
SMMWMRFFV	HLA-A0201	Homo	immunogenic
SMNATLVQA	HLA-A0201	Homo	immunogenic
SMQKFGEL	H-2-Kb	Mus	immunogenic
SMQKFGKL	H-2-Kb	Mus	immunogenic
SMSQELAEL	HLA-A0201	Mus	non-immunogenic
SMVGNWAKV	HLA-A0201	Homo	immunogenic
SMVGNWAKV	HLA-A0201	Mus	immunogenic
SMWALVISV	HLA-A0201	Mus	immunogenic
SMYCSKTFL	H-2-Db	Mus	immunogenic
SMYCSKTFL	H-2-Kb	Mus	immunogenic
SMYRVFEVGV	HLA-A0201	Homo	immunogenic
SMYRVFEVGV	HLA-A0201	Mus	immunogenic
SNHAAGYDL	H-2-Ld	Mus	immunogenic
SNQKNMFLK	HLA-A1101	Mus	non-immunogenic
SNYLFTKL	H-2-Kb	Mus	immunogenic
SNYNKSVNV	H-2-Kb	Mus	immunogenic
SPAIFQSSM	HLA-B0702	Homo	immunogenic
SPGAAGYDL	H-2-Ld	Mus	immunogenic
SPGIRPRFL	HLA-B0702	Mus	immunogenic
SPIVPSFDM	HLA-B0702	Mus	immunogenic
SPKAGLLSL	H-2-Ld	Mus	immunogenic
SPKAGLLSL	HLA-B0702	Homo	immunogenic
SPMNGGYYM	H-2-Ld	Mus	immunogenic
SPMYLWFNV	H-2-Ld	Mus	immunogenic
SPNRAAATL	H-2-Ld	Mus	immunogenic
SPRHYSTDL	HLA-B0702	Homo	immunogenic
SPRPVSYL	HLA-B0702	Mus	immunogenic
SPRTLNAWV	HLA-B0702	Homo	immunogenic
SPSSTPLLY	HLA-B3501	Mus	non-immunogenic
SPSYVYHQF	H-2-Ld	Mus	immunogenic
SPWAPTAPL	HLA-B0702	Homo	immunogenic
SPYAAGYDL	H-2-Ld	Mus	immunogenic
SQDLSFIYRK	HLA-A1101	Homo	immunogenic
SQKFIHCYR	HLA-A1101	Mus	non-immunogenic
SQKFIHCYRK	HLA-A1101	Mus	non-immunogenic
SQLDNLCTEM	H-2-Db	Mus	immunogenic
SQNINTVEM	H-2-Db	Mus	immunogenic
SQSDTVFDY	HLA-A3002	Homo	immunogenic
SQTSYQYL	H-2-Kb	Mus	immunogenic
SQYYYNSL	H-2-Kb	Mus	immunogenic
SRDSRGKPGY	HLA-B2705	Homo	immunogenic
SRFTYTALK	HLA-B2705	Homo	immunogenic
SRHHAFCFR	HLA-B2705	Mus	immunogenic
SRYWAIRTR	HLA-B2705	Homo	immunogenic
SRYWAIRTR	HLA-B2705	Mus	immunogenic
SSAYVFSVK	HLA-A0301	Homo	immunogenic
SSCSSCPLSK	HLA-A1101	Homo	immunogenic
SSEFCDMLK	HLA-A1101	Mus	non-immunogenic
SSFNNGSLFK	HLA-A1101	Mus	immunogenic
SSFNNGTL	H-2-Kb	Mus	immunogenic
SSGCYIHFFR	HLA-A1101	Mus	immunogenic
SSGNYVHCFR	HLA-A1101	Mus	non-immunogenic
SSIEFARL	H-2-Kb	Mus	immunogenic
SSIFLHLLR	HLA-A1101	Mus	immunogenic
SSIIRNLPK	HLA-A1101	Mus	immunogenic
SSIIRSLPK	HLA-A1101	Mus	immunogenic
SSISFCGV	H-2-Kb	Mus	immunogenic
SSKNMRWSPR	HLA-A1101	Mus	non-immunogenic
SSLENFRAYV	H-2-Db	Mus	immunogenic
SSLYGRYNCK	HLA-A1101	Mus	non-immunogenic
SSNIMSESY	HLA-A0101	Homo	immunogenic
SSNIMSESY	HLA-A3002	Homo	immunogenic
SSNQPSAEFR	HLA-A1101	Mus	non-immunogenic
SSQRDTILK	HLA-A1101	Mus	immunogenic
SSTFTRGAQK	HLA-A1101	Mus	immunogenic
SSVIGVWYL	H-2-Db	Mus	immunogenic
SSVVGVWYL	H-2-Db	Mus	immunogenic
SSVWNATTA	H-2-Db	Mus	immunogenic
SSWPPYNIL	H-2-Kb	Mus	immunogenic
SSYELPYVM	H-2-Db	Mus	immunogenic
SSYRRPVGI	H-2-Kb	Mus	immunogenic
SSYRRVPGI	H-2-Kb	Mus	immunogenic
STALDLSSNK	HLA-A1101	Mus	immunogenic
STFTRGAQK	HLA-A1101	Mus	non-immunogenic
STFWPCLLR	HLA-A0301	Homo	immunogenic
STGNYVHCFR	HLA-A1101	Mus	non-immunogenic
STKMKWSPR	HLA-A1101	Mus	non-immunogenic
STKQVAILK	HLA-A1101	Mus	immunogenic
STKQVAILKR	HLA-A1101	Mus	non-immunogenic
STLLTWHMHK	HLA-A1101	Mus	immunogenic
STLNFNNL	H-2-Kb	Mus	immunogenic
STNPKPQKK	HLA-A1101	Homo	immunogenic
STNVRSGMK	HLA-A0301	Homo	immunogenic
STNVRSGMK	HLA-A1101	Homo	immunogenic
STQQKSVLR	HLA-A1101	Mus	non-immunogenic
STREYLKL	H-2-Kb	Mus	immunogenic
STSFYLISI	HLA-A0201	Mus	non-immunogenic
STSINLPYI	H-2-Db	Mus	non-immunogenic
STSKKNVLK	HLA-A1101	Mus	non-immunogenic
STTPTAPSIR	HLA-A1101	Mus	non-immunogenic
STYTFVRT	H-2-Kb	Mus	immunogenic
STYTSLIIL	H-2-Kb	Mus	immunogenic
STYYVHENK	HLA-A1101	Mus	immunogenic
SVCACGLFK	HLA-A1101	Mus	immunogenic
SVFRENLFL	HLA-A0201	Homo	immunogenic
SVGGVFTSV	HLA-A0201	Homo	immunogenic
SVGGVFTSV	HLA-A0201	Mus	immunogenic
SVIGFLAL	H-2-Kb	Mus	immunogenic
SVLSSITNI	H-2-Kd	Mus	immunogenic
SVNGVMWTV	HLA-A0201	Homo	immunogenic
SVPYCNYTK	HLA-A1101	Mus	non-immunogenic
SVQNNTVLK	HLA-A1101	Mus	non-immunogenic
SVQRNTVFK	HLA-A1101	Mus	immunogenic
SVRDRLARL	HLA-A0203	Homo	immunogenic
SVRDRLARL	HLA-B0801	Homo	immunogenic
SVSDRCPLCK	HLA-A1101	Mus	non-immunogenic
SVSNRCPICK	HLA-A1101	Mus	non-immunogenic
SVSSRCPICK	HLA-A1101	Mus	immunogenic
SVYDFFVWL	H-2-Kb	Mus	immunogenic
SVYGFTGV	H-2-Kb	Mus	immunogenic
SVYIHGLI	H-2-Kb	Mus	non-immunogenic
SWFDFKSCL	H-2-Kb	Mus	immunogenic
SWLSLLVPF	HLA-A2402	Homo	immunogenic
SWPDGAELPF	HLA-A2402	Homo	immunogenic
SWPKFAVPNL	HLA-A2402	Mus	non-immunogenic
SYAEVRAAL	H-2-Kd	Mus	immunogenic
SYAGLCANV	H-2-Kd	Mus	immunogenic
SYENTEDEL	H-2-Kd	Mus	immunogenic
SYEPVLSSL	H-2-Kd	Mus	immunogenic
SYETFISRL	H-2-Kd	Mus	immunogenic
SYETGSSTL	H-2-Kd	Mus	immunogenic
SYETVLAFL	H-2-Kd	Mus	non-immunogenic
SYFETGFPI	H-2-Kd	Mus	immunogenic
SYGSGPLHL	H-2-Kd	Mus	non-immunogenic
SYIEKVRFL	H-2-Kd	Mus	immunogenic
SYIGSINNI	H-2-Kd	Mus	immunogenic
SYILFLSCI	H-2-Kd	Mus	immunogenic
SYIPSAEKI	H-2-Kd	Mus	immunogenic
SYISGTNGI	H-2-Kd	Mus	immunogenic
SYKDREWCF	HLA-A2402	Homo	immunogenic
SYMKSIQRI	H-2-Kd	Mus	immunogenic
SYNAMDGQI	H-2-Kd	Mus	immunogenic
SYNRSMTTI	H-2-Kd	Mus	immunogenic
SYNTGRFPPL	H-2-Kd	Mus	immunogenic
SYQFSENEI	H-2-Kd	Mus	immunogenic
SYQLLNFLPL	H-2-Kd	Mus	immunogenic
SYQPLGDKV	H-2-Kd	Mus	immunogenic
SYQPVKNSL	H-2-Kd	Mus	non-immunogenic
SYSEIARAI	H-2-Kd	Mus	immunogenic
SYSGVEGEGL	H-2-Kd	Mus	immunogenic
[truncated: 509 more rows]
