# Supplementary material for: Properties of MHC Class I Presented Peptides That Enhance Immunogenicity
Source: PLoS Comput Biol. 2013 Oct 24;9(10):e1003266. doi: 10.1371/journal.pcbi.1003266 (PMC3808449; doi:10.1371/journal.pcbi.1003266)
Supplement: Dataset S2 — A table with all non-redundant murine and human Dengue epitopes and non-epitopes ( Methods ). On each row, the peptide sequence (column A), the presenting MHC molecule (column B), the epitope/non-epitope classification (column C) and the host (column D) are described. (XLS) [file pcbi.1003266.s002.xls]

## Sheet: Sheet1
peptide	HLA	epitope status	host
MMLPATLAF	HLA-B3501	epitope	Homo
QEGAMHTAL	HLA-B4001	epitope	Homo
VATTFVTPM	HLA-B3501	epitope	Homo
YAQMWSLMY	HLA-B1501	epitope	Homo
TFKVPHAKR	HLA-A3301	epitope	Homo
MEGVFHTMW	HLA-B4403	epitope	Homo
ATGPILTLW	HLA-B5801	epitope	Homo
GPLVAGGLL	HLA-B0702	epitope	Homo
SQIGAGVYK	HLA-A1101	epitope	Homo
LEFEALGFM	HLA-B4001	epitope	Homo
KAKGSRAIW	HLA-B5701	epitope	Homo
TPEGIIPSM	HLA-B3501	epitope	Homo
KPWDVIPMV	HLA-B5101	epitope	Homo
WSIHAHHQW	HLA-B5801	epitope	Homo
QYSDRRWCF	HLA-A2402	epitope	Homo
DTTPFGQQR	HLA-A6801	epitope	Homo
NPEIEDDIF	HLA-B3501	epitope	Homo
GEGLHKLGY	HLA-B4403	epitope	Homo
IILEFFLMV	HLA-A0201	epitope	Homo
EENMDVEIW	HLA-B4403	epitope	Homo
ETACLGKAY	HLA-A2601	epitope	Homo
MLLALIAVL	HLA-A0201	epitope	Homo
VYTQLCDHR	HLA-A3301	epitope	Homo
CPTQGEAVL	HLA-B3501	epitope	Homo
LGFLNEDHW	HLA-B5701	epitope	Homo
TYLALIATF	HLA-A2402	epitope	Homo
KVRKDIQQW	HLA-B5701	epitope	Homo
KQIANELNY	HLA-B1501	epitope	Homo
MEITAEWLW	HLA-B5801	epitope	Homo
MLIPTAMAF	HLA-B3501	epitope	Homo
ETTHHAVSR	HLA-A6801	epitope	Homo
STYGWNLVR	HLA-A1101	epitope	Homo
LTAAVLLLI	HLA-B5801	epitope	Homo
TSGSPIIDK	HLA-A1101	epitope	Homo
IGIGILLTW	HLA-B5801	epitope	Homo
IGLTSRATW	HLA-B5801	epitope	Homo
RQLANAIFK	HLA-A1101	epitope	Homo
RQMEGEGVL	HLA-B1501	epitope	Homo
HPASAWTLY	HLA-B3501	epitope	Homo
QYIFTGQPL	HLA-A2402	epitope	Homo
ALRGLPIRY	HLA-A0301	epitope	Homo
IANQAAILM	HLA-B3501	epitope	Homo
TEMGRLPTF	HLA-B4402	non-epitope	Homo
LLKNDVPLA	HLA-A0203	non-epitope	Homo
KLITQFETY	HLA-B1501	non-epitope	Homo
KEENLVNSL	HLA-B4001	non-epitope	Homo
KILAKAIFK	HLA-A0301	non-epitope	Homo
LLIMGQLTW	HLA-B5801	non-epitope	Homo
VMVMVGATM	HLA-B1501	non-epitope	Homo
LQRKYGGAL	HLA-B1501	non-epitope	Homo
ALITVSGLY	HLA-A2601	non-epitope	Homo
ETAWDFGSV	HLA-A2601	non-epitope	Homo
GSCVTTMAK	HLA-A1101	non-epitope	Homo
KSRLNALGK	HLA-A3001	non-epitope	Homo
VFKEKVDTR	HLA-A3301	non-epitope	Homo
SYAMCTNTF	HLA-A2402	non-epitope	Homo
LAILFEEVM	HLA-B3501	non-epitope	Homo
EEHSSTWHY	HLA-B4403	non-epitope	Homo
ALWDVPSPA	HLA-A0201	non-epitope	Homo
NSTSTWVTY	HLA-A0101	non-epitope	Homo
VLFTFVLLL	HLA-A0201	non-epitope	Homo
FWKLVDRER	HLA-A3301	non-epitope	Homo
LTDALALGM	HLA-A0101	non-epitope	Homo
TTEAILPEY	HLA-A0101	non-epitope	Homo
YLDVDLHPA	HLA-A0201	non-epitope	Homo
INKRKKTSL	HLA-B0801	non-epitope	Homo
AENHHHATM	HLA-B4403	non-epitope	Homo
ISYGGGWRF	HLA-B5701	non-epitope	Homo
VEGLSGATW	HLA-B4402	non-epitope	Homo
KVRSNAALG	HLA-A3001	non-epitope	Homo
RVYADPMAL	HLA-A3201	non-epitope	Homo
IPEGRVIDL	HLA-B0702	non-epitope	Homo
RTLAKEGIK	HLA-A3001	non-epitope	Homo
ALFLEEMLR	HLA-A0301	non-epitope	Homo
GSSPIIEVK	HLA-A1101	non-epitope	Homo
GLLCLTLFV	HLA-A0201	non-epitope	Homo
SPAATQKAA	HLA-B0702	non-epitope	Homo
GTGNIGETL	HLA-A3201	non-epitope	Homo
GVVTRSGAY	HLA-A2601	non-epitope	Homo
LTWLGLNSR	HLA-A3301	non-epitope	Homo
KFREGSSEV	HLA-A3001	non-epitope	Homo
ATLAFHLTS	HLA-A3201	non-epitope	Homo
KVDNFTMGV	HLA-A0206	non-epitope	Homo
IEETNMITL	HLA-B4001	non-epitope	Homo
AVFQEEQGW	HLA-B5701	non-epitope	Homo
IQKETLVTF	HLA-B1501	non-epitope	Homo
LPEIEDEVF	HLA-B3501	non-epitope	Homo
SVICHETGR	HLA-A6801	non-epitope	Homo
VTLFFLSGK	HLA-A1101	non-epitope	Homo
ATLLVAVSF	HLA-A3201	non-epitope	Homo
EEESEGAIW	HLA-B4403	non-epitope	Homo
LPDTIETLM	HLA-B3501	non-epitope	Homo
AEHTGREIV	HLA-B4001	non-epitope	Homo
RMVLAFITF	HLA-B1501	non-epitope	Homo
KPSGSASSM	HLA-B0702	non-epitope	Homo
TSEIQLTDY	HLA-A0101	non-epitope	Homo
YYMATLKNV	HLA-A2301	non-epitope	Homo
DENKWKSAR	HLA-A3301	non-epitope	Homo
RVLSIPPTA	HLA-A3001	non-epitope	Homo
ITNITTDSR	HLA-A6801	non-epitope	Homo
ETTMRGAKR	HLA-A6801	non-epitope	Homo
VMRGKFGKK	HLA-A0301	non-epitope	Homo
LGAQALPVY	HLA-B1501	non-epitope	Homo
RTRVGTKHA	HLA-A3001	non-epitope	Homo
TENILTVLL	HLA-B4001	non-epitope	Homo
KLRDSYTQV	HLA-A0203	non-epitope	Homo
TPRSPSVEV	HLA-B0702	non-epitope	Homo
ILLENDMKF	HLA-A2301	non-epitope	Homo
WYMWLGARF	HLA-A2402	non-epitope	Homo
LEYTVVVTV	HLA-B4001	non-epitope	Homo
LIKNAQTPR	HLA-A3101	non-epitope	Homo
FCSHHFHEL	HLA-B0801	non-epitope	Homo
TPQAPTSEI	HLA-B0702	non-epitope	Homo
AQNALDNLV	HLA-A0206	non-epitope	Homo
KLGEFGRAK	HLA-A0301	non-epitope	Homo
FLIDGPETA	HLA-A0203	non-epitope	Homo
GLNSRSTSL	HLA-B0801	non-epitope	Homo
FVTLITGNM	HLA-A2601	non-epitope	Homo
AMEELPDTI	HLA-A3201	non-epitope	Homo
ISSTPFAEY	HLA-A0101	non-epitope	Homo
LETRAETWM	HLA-B4001	non-epitope	Homo
RSTPFNMLK	HLA-A1101	non-epitope	Homo
ATFKIQPFL	HLA-A3001	non-epitope	Homo
AYQHALNEL	HLA-A2301	non-epitope	Homo
VLNSLGKMV	HLA-A0203	non-epitope	Homo
QEHETSWHY	HLA-B4403	non-epitope	Homo
IESQKNGSW	HLA-B4402	non-epitope	Homo
TTIFAGHLK	HLA-A6801	non-epitope	Homo
KAKIFTPEA	HLA-A3001	non-epitope	Homo
CTTTGEHRR	HLA-A6801	non-epitope	Homo
TPTWNRKEL	HLA-B0702	non-epitope	Homo
MTLWYMWQV	HLA-A0206	non-epitope	Homo
MVGANASDR	HLA-A6801	non-epitope	Homo
AEISGSSPI	HLA-B4001	non-epitope	Homo
IAVGGITLF	HLA-B5801	non-epitope	Homo
RSQVGVGVF	HLA-B1501	non-epitope	Homo
EVEDYGFGM	HLA-A2601	non-epitope	Homo
AYVVIGLLF	HLA-A2301	non-epitope	Homo
TTNIWMKFR	HLA-A3101	non-epitope	Homo
RSVSGDLIL	HLA-B5801	non-epitope	Homo
IMKNTTNTR	HLA-A3101	non-epitope	Homo
MTAGIFLFF	HLA-A2601	non-epitope	Homo
IFKLTYQNK	HLA-A3001	non-epitope	Homo
ETKGVERLK	HLA-A6801	non-epitope	Homo
SPARLASAI	HLA-B0702	non-epitope	Homo
SLSVSLVLV	HLA-A0203	non-epitope	Homo
IFLFLMSGR	HLA-A3301	non-epitope	Homo
NEAKITDIM	HLA-B4001	non-epitope	Homo
LLKTALLIV	HLA-A0203	non-epitope	Homo
RELKCGSGI	HLA-B4001	non-epitope	Homo
VIDLEPISY	HLA-A0101	non-epitope	Homo
GMLIACYVI	HLA-A2301	non-epitope	Homo
ITWIGMNSR	HLA-A3301	non-epitope	Homo
LLMRTTWAL	HLA-B0801	non-epitope	Homo
ISLGLILLK	HLA-A1101	non-epitope	Homo
RLKMDKLTL	HLA-B0801	non-epitope	Homo
KQLGQIMLL	HLA-A0206	non-epitope	Homo
KQIQRVETW	HLA-A3201	non-epitope	Homo
KVSCTILAV	HLA-A0206	non-epitope	Homo
KVKYEGAGA	HLA-A3001	non-epitope	Homo
LPEYGTLGL	HLA-B0702	non-epitope	Homo
TVCYVLTGR	HLA-A6801	non-epitope	Homo
EVKSCHWPK	HLA-A3301	non-epitope	Homo
MENLLWKQI	HLA-B4402	non-epitope	Homo
TYLALLAAF	HLA-A2301	non-epitope	Homo
RSLIGNEEF	HLA-B5801	non-epitope	Homo
MLMTGTLAV	HLA-A0203	non-epitope	Homo
IMKSVGTGK	HLA-A0301	non-epitope	Homo
TPRRGTGTT	HLA-B0702	non-epitope	Homo
AETQHGTVL	HLA-B4001	non-epitope	Homo
KVRPTFAAG	HLA-A3001	non-epitope	Homo
QVFGSVYTT	HLA-A3201	non-epitope	Homo
TVNPIVTEK	HLA-A1101	non-epitope	Homo
RHRKPTYEK	HLA-A3001	non-epitope	Homo
GEEVQVLAL	HLA-B4001	non-epitope	Homo
KLLTKPWDV	HLA-A0201	non-epitope	Homo
ILIGVVITW	HLA-B5701	non-epitope	Homo
GLLCISIMI	HLA-A0201	non-epitope	Homo
LIIMDEAHF	HLA-B1501	non-epitope	Homo
GLFGKGSLV	HLA-A0203	non-epitope	Homo
IESSKNQTW	HLA-B4402	non-epitope	Homo
WQIERASLI	HLA-A0206	non-epitope	Homo
SENEVKLTI	HLA-B4403	non-epitope	Homo
EEEEAGVLW	HLA-B4403	non-epitope	Homo
IPNHGVTAT	HLA-B3501	non-epitope	Homo
KTDWLPMTV	HLA-A0101	non-epitope	Homo
KSWLVHKQW	HLA-B5701	non-epitope	Homo
TWKLARASF	HLA-A2301	non-epitope	Homo
TWILRHPGF	HLA-A2402	non-epitope	Homo
MAMTTVLSI	HLA-B5101	non-epitope	Homo
ITEAELTGY	HLA-A0101	non-epitope	Homo
NWLNNNIQF	HLA-A2301	non-epitope	Homo
LEKAANVQW	HLA-B4402	non-epitope	Homo
IMQRGLFGK	HLA-A1101	non-epitope	Homo
NFQTMPGTF	HLA-A2301	non-epitope	Homo
ITASILLWY	HLA-A0101	non-epitope	Homo
VEGVSGGAW	HLA-B4403	non-epitope	Homo
NERGKSLLF	HLA-B4403	non-epitope	Homo
AVFKMSPGY	HLA-A2601	non-epitope	Homo
SASRAWNVW	HLA-B5701	non-epitope	Homo
SSADLSLEK	HLA-A1101	non-epitope	Homo
TESHNQTFL	HLA-B4001	non-epitope	Homo
WAKNIHTAI	HLA-B0801	non-epitope	Homo
NESDPEGAL	HLA-B4001	non-epitope	Homo
RTYCIEASI	HLA-A3201	non-epitope	Homo
MLQGRGPLK	HLA-A0301	non-epitope	Homo
IGKALHQVF	HLA-B1501	non-epitope	Homo
RMLNILNGR	HLA-A3101	non-epitope	Homo
NENDQYIYM	HLA-B4403	non-epitope	Homo
KWKRQLNSL	HLA-A3001	non-epitope	Homo
KSIEDNPEI	HLA-B5801	non-epitope	Homo
HERGRPLLF	HLA-B4403	non-epitope	Homo
FPYSIPATL	HLA-B5101	non-epitope	Homo
SETFSMGLL	HLA-B4001	non-epitope	Homo
TVAWRTATL	HLA-B0702	non-epitope	Homo
YMPTVIEEL	HLA-A0201	non-epitope	Homo
RIKQQGIFG	HLA-A3001	non-epitope	Homo
TEIASLPTY	HLA-B4402	non-epitope	Homo
DVIGERIKR	HLA-A3301	non-epitope	Homo
SPAAAQKAT	HLA-B0702	non-epitope	Homo
MECSPRTGL	HLA-B4001	non-epitope	Homo
FLSGRGLGK	HLA-A0301	non-epitope	Homo
VVVDEHCGY	HLA-A2601	non-epitope	Homo
VIYDSKFEK	HLA-A1101	non-epitope	Homo
TLYAVATTV	HLA-A0203	non-epitope	Homo
GGWRFQGSW	HLA-B5701	non-epitope	Homo
LSAAIGKAW	HLA-B5701	non-epitope	Homo
LAMATTLQL	HLA-B0702	non-epitope	Homo
ETALMVIGM	HLA-A2601	non-epitope	Homo
KHVQRIETW	HLA-B5801	non-epitope	Homo
KLREVYTQL	HLA-A0203	non-epitope	Homo
MDLEKRHVL	HLA-B0801	non-epitope	Homo
SVVETLEQM	HLA-A2601	non-epitope	Homo
WQQVPFCSH	HLA-B1501	non-epitope	Homo
TPPGSVEAF	HLA-B3501	non-epitope	Homo
ISNITTATR	HLA-A3101	non-epitope	Homo
RREKRSVAL	HLA-B0801	non-epitope	Homo
VVVGDIIGV	HLA-A0206	non-epitope	Homo
FPLCLSTTS	HLA-B3501	non-epitope	Homo
GPLRLFMAL	HLA-B0801	non-epitope	Homo
MLAVWNRVW	HLA-B5701	non-epitope	Homo
LMMLVAPSY	HLA-B1501	non-epitope	Homo
RLGYILEEI	HLA-A3201	non-epitope	Homo
TMFLITENK	HLA-A1101	non-epitope	Homo
EPWLKNNQF	HLA-B3501	non-epitope	Homo
ALNELPESL	HLA-A0203	non-epitope	Homo
QPKPGTRMV	HLA-B0702	non-epitope	Homo
WEGGHDLTV	HLA-B4001	non-epitope	Homo
ITFLRVLSI	HLA-A3201	non-epitope	Homo
ASDRMGMGV	HLA-A0101	non-epitope	Homo
VLDDGIYRI	HLA-A0201	non-epitope	Homo
SILASSLLK	HLA-A1101	non-epitope	Homo
PEVANLDII	HLA-B4001	non-epitope	Homo
STRDGEPLM	HLA-A3001	non-epitope	Homo
YPLAIPVTM	HLA-B3501	non-epitope	Homo
GEKALKLSW	HLA-B4402	non-epitope	Homo
QMAPHHKIL	HLA-B0801	non-epitope	Homo
IWGRKSWPI	HLA-A2402	non-epitope	Homo
HEWMTTEDM	HLA-B4402	non-epitope	Homo
SMAMRCVGI	HLA-B0801	non-epitope	Homo
HTIENTSAN	HLA-A2601	non-epitope	Homo
HMIVSKQER	HLA-A3101	non-epitope	Homo
VSTPQGLVK	HLA-A1101	non-epitope	Homo
PFGDSYVII	HLA-A2301	non-epitope	Homo
LLNGQGPMK	HLA-A0301	non-epitope	Homo
VTTWENVPY	HLA-A0101	non-epitope	Homo
TIIGRRLQR	HLA-A3301	non-epitope	Homo
LNGRKRSTM	HLA-B0801	non-epitope	Homo
ALFEPEREK	HLA-A0301	non-epitope	Homo
PLAENTNSV	HLA-A0203	non-epitope	Homo
SLAAIANQA	HLA-A0203	non-epitope	Homo
ILIGFLVLW	HLA-B5701	non-epitope	Homo
TILIKVEYK	HLA-A1101	non-epitope	Homo
LGKCGSCVY	HLA-B1501	non-epitope	Homo
HWVEITALI	HLA-A2402	non-epitope	Homo
LLATVTGGI	HLA-A0203	non-epitope	Homo
ILLKMVTHF	HLA-B1501	non-epitope	Homo
HVLGRLITV	HLA-A0206	non-epitope	Homo
LEKKITQWL	HLA-B4001	non-epitope	Homo
ILKDGPERV	HLA-A0203	non-epitope	Homo
PWLSSKPEF	HLA-A2301	non-epitope	Homo
QVIAVEPGK	HLA-A1101	non-epitope	Homo
RQWFFDLPL	HLA-A3201	non-epitope	Homo
IVIGIITLY	HLA-A2601	non-epitope	Homo
VLMHRGKRI	HLA-B0801	non-epitope	Homo
MTDDIGMGV	HLA-A0101	non-epitope	Homo
NEEKITQQM	HLA-B4402	non-epitope	Homo
QMSSGNLLF	HLA-B1501	non-epitope	Homo
TTLSRTSKK	HLA-A1101	non-epitope	Homo
AERTGEPDY	HLA-B4403	non-epitope	Homo
MGANFRAGR	HLA-A6801	non-epitope	Homo
GWGNGCGLF	HLA-A2301	non-epitope	Homo
ITLDILTEI	HLA-A0206	non-epitope	Homo
IASAIVLEF	HLA-B5801	non-epitope	Homo
HAHWTEAKM	HLA-B3501	non-epitope	Homo
RSCTMPPLR	HLA-A3101	non-epitope	Homo
GASTSQETW	HLA-B5801	non-epitope	Homo
QVAINQVRR	HLA-A6801	non-epitope	Homo
GMSKEPGVV	HLA-A0203	non-epitope	Homo
IVMLHTTER	HLA-A6801	non-epitope	Homo
RQDLLVTFK	HLA-A1101	non-epitope	Homo
TEFQPHQLW	HLA-B4402	non-epitope	Homo
LLLTLLATV	HLA-A0201	non-epitope	Homo
CLRRRVTRK	HLA-A0301	non-epitope	Homo
VSSVNTTSK	HLA-A1101	non-epitope	Homo
KVVQHENLK	HLA-A0301	non-epitope	Homo
TFIKTTFSL	HLA-A2301	non-epitope	Homo
HTWQKQTQR	HLA-A3301	non-epitope	Homo
WSYYCGGLK	HLA-A0301	non-epitope	Homo
ALKRRLRTL	HLA-B0801	non-epitope	Homo
QETWNRQDL	HLA-B4001	non-epitope	Homo
TWRDMAHTL	HLA-A2301	non-epitope	Homo
MTLGMCCII	HLA-A3201	non-epitope	Homo
ELCEDTMTY	HLA-A2601	non-epitope	Homo
EELGDGLAM	HLA-B4403	non-epitope	Homo
KFQPESPSK	HLA-A3001	non-epitope	Homo
SLLGSALLK	HLA-A0301	non-epitope	Homo
WTMKILIGV	HLA-A0206	non-epitope	Homo
LIVSGIFPY	HLA-B1501	non-epitope	Homo
RWLWGFLSR	HLA-A3101	non-epitope	Homo
NYKERMVTF	HLA-A2402	non-epitope	Homo
YQGKTVWFV	HLA-A0206	non-epitope	Homo
TPQPMELKY	HLA-B3501	non-epitope	Homo
IPKIYGGPI	HLA-B0702	non-epitope	Homo
SEMIIPKNF	HLA-B4402	non-epitope	Homo
LGRNKRPRL	HLA-B0801	non-epitope	Homo
VTCAMFTCK	HLA-A1101	non-epitope	Homo
GTLALSLTF	HLA-A3201	non-epitope	Homo
KITGNLVQI	HLA-A3201	non-epitope	Homo
LLTIGLSLV	HLA-A0203	non-epitope	Homo
DTSECPNER	HLA-A3301	non-epitope	Homo
ALLAGFMAY	HLA-B1501	non-epitope	Homo
LEKHGAERL	HLA-B4001	non-epitope	Homo
SEFQIYKKS	HLA-B4403	non-epitope	Homo
KEVALLRTY	HLA-B4403	non-epitope	Homo
LMKSLGGGR	HLA-A3101	non-epitope	Homo
FMTATPPGA	HLA-A0203	non-epitope	Homo
EIWTKEGER	HLA-A3301	non-epitope	Homo
MVSAGSGEV	HLA-A0203	non-epitope	Homo
AEPDDVDCW	HLA-B4402	non-epitope	Homo
VTRKHMILA	HLA-A3001	non-epitope	Homo
KVRMEKLRI	HLA-A3001	non-epitope	Homo
TLLSLTFIK	HLA-A0301	non-epitope	Homo
KVDAIDGEY	HLA-A0101	non-epitope	Homo
RVIDLGCGR	HLA-A3101	non-epitope	Homo
AVFVDENQW	HLA-B5701	non-epitope	Homo
LLKATLLAV	HLA-A0203	non-epitope	Homo
DVISRRDQR	HLA-A3301	non-epitope	Homo
RPAKSGTVM	HLA-B0702	non-epitope	Homo
IWPKSHTLW	HLA-A2402	non-epitope	Homo
YLMTLMKGA	HLA-A0203	non-epitope	Homo
KALKINWYK	HLA-A1101	non-epitope	Homo
IAVGMVTLY	HLA-B3501	non-epitope	Homo
RTLILAPTR	HLA-A3101	non-epitope	Homo
SQSTIPETI	HLA-A3201	non-epitope	Homo
RSGAYVSAI	HLA-A3201	non-epitope	Homo
LNRRRRTAG	HLA-B0801	non-epitope	Homo
MELKYSWKT	HLA-B4403	non-epitope	Homo
TLKRRSWPL	HLA-B0801	non-epitope	Homo
GESNIVIGI	HLA-B4001	non-epitope	Homo
NMLSIINKR	HLA-A3301	non-epitope	Homo
KTWGKAKIF	HLA-A3201	non-epitope	Homo
AVVLMGLDK	HLA-A1101	non-epitope	Homo
VAATMANEM	HLA-B3501	non-epitope	Homo
EEYVDYMPV	HLA-B4001	non-epitope	Homo
LLFLNDMGK	HLA-A0301	non-epitope	Homo
AVILQNAWK	HLA-A1101	non-epitope	Homo
LAMGIMMLK	HLA-A1101	non-epitope	Homo
LLLRKLTSK	HLA-A0301	non-epitope	Homo
IPLCRTSCL	HLA-B0801	non-epitope	Homo
LVQIENLEY	HLA-A0101	non-epitope	Homo
LMKMKKKTW	HLA-B0801	non-epitope	Homo
WMASVEPHW	HLA-B5801	non-epitope	Homo
EVMRSRWSR	HLA-A3301	non-epitope	Homo
SALTLHWFR	HLA-A3101	non-epitope	Homo
MMGKREKKL	HLA-B0801	non-epitope	Homo
RSWNSGHEW	HLA-B5801	non-epitope	Homo
FQRALIFIL	HLA-A0206	non-epitope	Homo
LLILCTSQI	HLA-A0203	non-epitope	Homo
DWIPLALTI	HLA-A2402	non-epitope	Homo
LTGGVTLFF	HLA-B5801	non-epitope	Homo
ATVLMGLGK	HLA-A1101	non-epitope	Homo
LMSGRGIGK	HLA-A0301	non-epitope	Homo
KLAEAIFKL	HLA-A0201	non-epitope	Homo
GYISTRVEM	HLA-A2301	non-epitope	Homo
LAHRTRNAL	HLA-B0702	non-epitope	Homo
CTGKFKIVK	HLA-A1101	non-epitope	Homo
AGLAFSLMK	HLA-A1101	non-epitope	Homo
SPKRLSAAI	HLA-B0801	non-epitope	Homo
KTQRSGALW	HLA-B5701	non-epitope	Homo
TEEIAVQNW	HLA-B4402	non-epitope	Homo
IESALNDTW	HLA-B4402	non-epitope	Homo
SLGCKPLTM	HLA-B0801	non-epitope	Homo
MFKKRNLTI	HLA-B0801	non-epitope	Homo
EVHTWTEQY	HLA-A2601	non-epitope	Homo
EVKKQRAGV	HLA-A2601	non-epitope	Homo
RMIVGKNER	HLA-A3101	non-epitope	Homo
KTQAIDGEF	HLA-B5801	non-epitope	Homo
YVFSGDPLK	HLA-A6801	non-epitope	Homo
SLVMLLVHY	HLA-B1501	non-epitope	Homo
ATYEPDVDL	HLA-A3201	non-epitope	Homo
ILARWSSFK	HLA-A0301	non-epitope	Homo
EEEQTLTIL	HLA-B4001	non-epitope	Homo
MYFHRRDLR	HLA-A3301	non-epitope	Homo
VVIAILTVV	HLA-A0206	non-epitope	Homo
TEHGTIATI	HLA-B4001	non-epitope	Homo
RARNRVSTV	HLA-B0801	non-epitope	Homo
ILIRTGLLV	HLA-A0203	non-epitope	Homo
AIKILIGFR	HLA-A3101	non-epitope	Homo
IPKNFAGPV	HLA-B0702	non-epitope	Homo
ALSELPETL	HLA-A3201	non-epitope	Homo
DTRTPRAKR	HLA-A3301	non-epitope	Homo
SLLTCAKFK	HLA-A0301	non-epitope	Homo
FTMRLLSPV	HLA-A0206	non-epitope	Homo
RVPSHLAHR	HLA-A3101	non-epitope	Homo
TIMAVLFVV	HLA-A0206	non-epitope	Homo
MQAGKRSLR	HLA-A3101	non-epitope	Homo
GTFKKSGAI	HLA-A3201	non-epitope	Homo
MSAAIKDNR	HLA-A6801	non-epitope	Homo
KMRPMFAVG	HLA-B1501	non-epitope	Homo
KTNTGTIGA	HLA-A3001	non-epitope	Homo
KMDIGVPLL	HLA-A0201	non-epitope	Homo
EVTNPAVLR	HLA-A6801	non-epitope	Homo
ETMETLLLL	HLA-A2601	non-epitope	Homo
ELGKKKTPR	HLA-A3301	non-epitope	Homo
VSGKLIHEW	HLA-B5701	non-epitope	Homo
VSWSGRELK	HLA-A1101	non-epitope	Homo
NYILWENNI	HLA-A2301	non-epitope	Homo
VLLGSFGCK	HLA-A0301	non-epitope	Homo
TLAVFLLLI	HLA-A0201	non-epitope	Homo
TTRNGEPHM	HLA-A3001	non-epitope	Homo
LLFKTSAGV	HLA-A0203	non-epitope	Homo
PLNEGVMAV	HLA-A0203	non-epitope	Homo
MLLNRFTMA	HLA-B0801	non-epitope	Homo
IQRTVFFVL	HLA-B1501	non-epitope	Homo
AISCVPNAV	HLA-A0203	non-epitope	Homo
IQNSGGTSI	HLA-B1501	non-epitope	Homo
AETQNSSFI	HLA-B4402	non-epitope	Homo
VVRPPFNML	HLA-B0702	non-epitope	Homo
NSKNTSMSF	HLA-B1501	non-epitope	Homo
IIFILLMLV	HLA-A0201	non-epitope	Homo
GYVLGIFLR	HLA-A3301	non-epitope	Homo
KFQADSPKR	HLA-A3101	non-epitope	Homo
LSKSEFNTY	HLA-B1501	non-epitope	Homo
EWLWRTLGR	HLA-A3301	non-epitope	Homo
DTSEVHWNY	HLA-A0101	non-epitope	Homo
FVIDNVHTW	HLA-B5801	non-epitope	Homo
TPNLAKRVL	HLA-B0702	non-epitope	Homo
TSSQQKADW	HLA-B5701	non-epitope	Homo
LLFRRLTSR	HLA-A3101	non-epitope	Homo
LAVSGVYPM	HLA-B3501	non-epitope	Homo
GLLFMILTV	HLA-A0201	non-epitope	Homo
TSADLTVEK	HLA-A1101	non-epitope	Homo
ELKGMSYAM	HLA-A2601	non-epitope	Homo
HLAIMAVFK	HLA-A0301	non-epitope	Homo
RTEAKSALK	HLA-A3001	non-epitope	Homo
RTAGMIIML	HLA-A3201	non-epitope	Homo
CTGSFKLEK	HLA-A1101	non-epitope	Homo
RERLSRMAI	HLA-B4001	non-epitope	Homo
FLAHYIGTS	HLA-A0203	non-epitope	Homo
TLFVEECLR	HLA-A6801	non-epitope	Homo
SQHNYRPGY	HLA-B1501	non-epitope	Homo
LPVCQSSSM	HLA-B3501	non-epitope	Homo
MVLLQMENK	HLA-A1101	non-epitope	Homo
HSGVDVFYK	HLA-A1101	non-epitope	Homo
KSKAINVLR	HLA-A3101	non-epitope	Homo
VEVQDDGTM	HLA-B4001	non-epitope	Homo
RARVSQGAG	HLA-A3001	non-epitope	Homo
EATQLATLR	HLA-A6801	non-epitope	Homo
LLLGLMILL	HLA-A0201	non-epitope	Homo
RVWIQENPW	HLA-B5701	non-epitope	Homo
LTDYGALTL	HLA-A0101	non-epitope	Homo
FAVGLLFRR	HLA-A3301	non-epitope	Homo
DVRNDMISY	HLA-A2601	non-epitope	Homo
ALSEGVYRI	HLA-A0203	non-epitope	Homo
MILAVVITL	HLA-A0201	non-epitope	Homo
EQMANGIAL	HLA-B4001	non-epitope	Homo
RGRIGRNPK	HLA-A3001	non-epitope	Homo
YFWQKKKQR	HLA-A3301	non-epitope	Homo
FIRSTMSLV	HLA-A0203	non-epitope	Homo
KKMIRPQPM	HLA-B0801	non-epitope	Homo
VSTVQQLTK	HLA-A1101	non-epitope	Homo
ESRTIRVLK	HLA-A6801	non-epitope	Homo
GMMVLKIVR	HLA-A3101	non-epitope	Homo
KAKRGTAQI	HLA-A3001	non-epitope	Homo
AIFLTTLSR	HLA-A1101	non-epitope	Homo
TYSDPLALR	HLA-A3301	non-epitope	Homo
KGKRIEPSW	HLA-B5701	non-epitope	Homo
ILNAHEDGV	HLA-A0203	non-epitope	Homo
MEFIDGISL	HLA-B4001	non-epitope	Homo
NRRKRSVTM	HLA-B0801	non-epitope	Homo
NERRAWNFL	HLA-B4403	non-epitope	Homo
FMAYMIGQT	HLA-A0203	non-epitope	Homo
IPHDLMELI	HLA-B5101	non-epitope	Homo
SEIPNLDII	HLA-B4001	non-epitope	Homo
GLFTSLGKA	HLA-A0203	non-epitope	Homo
SQLAKRFSR	HLA-A3101	non-epitope	Homo
IALGLMALK	HLA-A1101	non-epitope	Homo
YQVKTETTI	HLA-A0206	non-epitope	Homo
ATLLVWHTW	HLA-B5701	non-epitope	Homo
KTFDTEYPK	HLA-A1101	non-epitope	Homo
STTSQKTTW	HLA-B5701	non-epitope	Homo
KEKVVGRII	HLA-B4001	non-epitope	Homo
TIFTLTVAW	HLA-A3201	non-epitope	Homo
VILAGPIPV	HLA-A0201	non-epitope	Homo
EEYKRSGIL	HLA-B4001	non-epitope	Homo
LAAVSVSPL	HLA-B0702	non-epitope	Homo
NTYKRSGIM	HLA-A2601	non-epitope	Homo
AIGTSITQK	HLA-A0301	non-epitope	Homo
LVISGLFPV	HLA-A0206	non-epitope	Homo
KPIDDRFAT	HLA-B0702	non-epitope	Homo
KTRRYLPAI	HLA-A3001	non-epitope	Homo
PTAGVLARW	HLA-B5701	non-epitope	Homo
MFGGVSWMI	HLA-A2301	non-epitope	Homo
GATTETPTW	HLA-B5701	non-epitope	Homo
ETLGEKWKR	HLA-A3301	non-epitope	Homo
TQTAGPWHL	HLA-A0206	non-epitope	Homo
LLLGVGLAM	HLA-B1501	non-epitope	Homo
LMIVARHER	HLA-A3101	non-epitope	Homo
AAAWYLWEV	HLA-A0201	epitope	Mus
TVMDIISRR	HLA-A1101	epitope	Mus
LPAIVREAI	HLA-B0702	epitope	Mus
KTFDSEYVK	HLA-A1101	epitope	Mus
ALSELPETL	HLA-A0201	epitope	Mus
SQIGAGVYK	HLA-A1101	epitope	Mus
IMAVGMVSI	HLA-A0201	epitope	Mus
RLITVNPIV	HLA-A0201	epitope	Mus
ATVLMGLGK	HLA-A1101	epitope	Mus
KLAEAIFKL	HLA-A0201	epitope	Mus
VPNYNLIIM	HLA-B0702	epitope	Mus
MTDDIGMGV	HLA-A0101	epitope	Mus
LTDALALGM	HLA-A0101	epitope	Mus
RPTPRGTVM	HLA-B0702	epitope	Mus
IILEFFLIV	HLA-A0201	epitope	Mus
STYGWNLVR	HLA-A1101	epitope	Mus
ITEAELTGY	HLA-A0101	epitope	Mus
GLLTVCYVL	HLA-A0201	epitope	Mus
YTDYMPSMK	HLA-A0101	epitope	Mus
RTTWSIHAK	HLA-A1101	epitope	Mus
KPRWLDARI	HLA-B0702	epitope	Mus
VIDLDPIPY	HLA-A0101	epitope	Mus
GLFPVSIPI	HLA-A0201	non-epitope	Mus
TVNPIVTEK	HLA-A1101	non-epitope	Mus
TTLSRTSKK	HLA-A1101	non-epitope	Mus
LVMKDGRVL	HLA-B0702	non-epitope	Mus
VTFKNPHAK	HLA-A1101	non-epitope	Mus
WLVHKQWFL	HLA-A0201	non-epitope	Mus
IPKNFAGPV	HLA-B0702	non-epitope	Mus
GSCVTTMAK	HLA-A1101	non-epitope	Mus
ALCEALTLA	HLA-A0201	non-epitope	Mus
MPVTHSSAA	HLA-B0702	non-epitope	Mus
MSYSMCTGK	HLA-A1101	non-epitope	Mus
APSMTMRCI	HLA-B0702	non-epitope	Mus
TTFITPMLR	HLA-A1101	non-epitope	Mus
RPRWLDART	HLA-B0702	non-epitope	Mus
IILEFFLMV	HLA-A0201	non-epitope	Mus
TTNIWLKLK	HLA-A1101	non-epitope	Mus
NSTSTWVTY	HLA-A0101	non-epitope	Mus
VQTKPGLFK	HLA-A1101	non-epitope	Mus
VIDLEPIPY	HLA-A0101	non-epitope	Mus
CTGKFKIVK	HLA-A1101	non-epitope	Mus
YVVIAILTV	HLA-A0201	non-epitope	Mus
SLSVSLVLV	HLA-A0201	non-epitope	Mus
KMDIGVPLL	HLA-A0201	non-epitope	Mus
IPMTGPLVA	HLA-B0702	non-epitope	Mus
GVFHTMWHV	HLA-A0201	non-epitope	Mus
LLLTLLATV	HLA-A0201	non-epitope	Mus
FLNEDHWFS	HLA-A0201	non-epitope	Mus
FLIDGPETA	HLA-A0201	non-epitope	Mus
ITASILLWY	HLA-A0101	non-epitope	Mus
KTFDTEYQK	HLA-A1101	non-epitope	Mus
MIIMLIPTV	HLA-A0201	non-epitope	Mus
RLLTKPWDV	HLA-A0201	non-epitope	Mus
LLMLVTPSM	HLA-A0201	non-epitope	Mus
IPTAMAFHL	HLA-B0702	non-epitope	Mus
LLILCVTQV	HLA-A0201	non-epitope	Mus
YQLAVTIMA	HLA-A0201	non-epitope	Mus
VILAGPMPV	HLA-A0201	non-epitope	Mus
MTQKARDAL	HLA-B0702	non-epitope	Mus
LAAVSVSPL	HLA-B0702	non-epitope	Mus
SSMVNGVVK	HLA-A1101	non-epitope	Mus
SSADLSLEK	HLA-A1101	non-epitope	Mus
YMWLGARFL	HLA-A0201	non-epitope	Mus
YLAGAGLAF	HLA-B0702	non-epitope	Mus
CPTQGEPSL	HLA-B0702	non-epitope	Mus
HPGFTLMAA	HLA-B0702	non-epitope	Mus
ATYGWNLVK	HLA-A1101	non-epitope	Mus
GPSLRTTTV	HLA-B0702	non-epitope	Mus
FPQSNAPIM	HLA-B0702	non-epitope	Mus
YAQMWTLMY	HLA-A0101	non-epitope	Mus
VTCAMFTCK	HLA-A1101	non-epitope	Mus
SPSKLASAI	HLA-B0702	non-epitope	Mus
ILTDGPERV	HLA-A0201	non-epitope	Mus
TPRGTVMDI	HLA-B0702	non-epitope	Mus
LTALNDMGK	HLA-A1101	non-epitope	Mus
TPEGIIPAL	HLA-B0702	non-epitope	Mus
FTDPASIAA	HLA-A0101	non-epitope	Mus
LALGMMVLK	HLA-A1101	non-epitope	Mus
LPIRYQTPA	HLA-B0702	non-epitope	Mus
RPTFAAGLL	HLA-B0702	non-epitope	Mus
RPGYHTQTA	HLA-B0702	non-epitope	Mus
VSTGSQLAK	HLA-A1101	non-epitope	Mus
GQLKLNWFK	HLA-A1101	non-epitope	Mus
RVIDPRRCL	HLA-B0702	non-epitope	Mus
VLMMRTTWA	HLA-A0201	non-epitope	Mus
LLLLVAHYA	HLA-A0201	non-epitope	Mus
TVWFVPSIK	HLA-A1101	non-epitope	Mus
NPLTLTAAV	HLA-B0702	non-epitope	Mus
LTAALLLLV	HLA-A0101	non-epitope	Mus
SQLAKRFSK	HLA-A1101	non-epitope	Mus
MLQGRGPLK	HLA-A1101	non-epitope	Mus
TAGPWHLGK	HLA-A1101	non-epitope	Mus
RPASAWTLY	HLA-B0702	non-epitope	Mus
LMMTTIGIV	HLA-A0201	non-epitope	Mus
GPMKLVMAF	HLA-B0702	non-epitope	Mus
KSAAIDGEY	HLA-A0101	non-epitope	Mus
FTMRLLSPV	HLA-A0201	non-epitope	Mus
MVLLQMEDK	HLA-A1101	non-epitope	Mus
ALIFILLTA	HLA-A0201	non-epitope	Mus
RLRMDKLQL	HLA-B0702	non-epitope	Mus
TPPGSRDPF	HLA-B0702	non-epitope	Mus
VSTVQQLTK	HLA-A1101	non-epitope	Mus
SILASSLLK	HLA-A1101	non-epitope	Mus
IPMVTQMAM	HLA-B0702	non-epitope	Mus
FLDLPLPWL	HLA-A0201	non-epitope	Mus
AIFLTTLSR	HLA-A1101	non-epitope	Mus
AVILQNAWK	HLA-A1101	non-epitope	Mus
LTSRATWAK	HLA-A1101	non-epitope	Mus
KITAEWLWK	HLA-A1101	non-epitope	Mus
RSTPFNMLK	HLA-A1101	non-epitope	Mus
GPLVAGGLL	HLA-B0702	non-epitope	Mus
SMFEPEREK	HLA-A1101	non-epitope	Mus
KSEFQIYKK	HLA-A1101	non-epitope	Mus
LVISGLFPV	HLA-A0201	non-epitope	Mus
VLNPYMPTV	HLA-A0201	non-epitope	Mus
ILLVAVSFV	HLA-A0201	non-epitope	Mus
YSQIGAGVY	HLA-A0101	non-epitope	Mus
ITYKCPLLR	HLA-A1101	non-epitope	Mus
AVSMANIFR	HLA-A1101	non-epitope	Mus
WTMKILIGV	HLA-A0201	non-epitope	Mus
MISRMLINR	HLA-A1101	non-epitope	Mus
GPLRLFMAL	HLA-B0702	non-epitope	Mus
MLINRFTMK	HLA-A1101	non-epitope	Mus
LVMAFIAFL	HLA-A0201	non-epitope	Mus
QPHWIAASI	HLA-B0702	non-epitope	Mus
TLYAVATTV	HLA-A0201	non-epitope	Mus
TIMAAILAY	HLA-A1101	non-epitope	Mus
KTFVELMRR	HLA-A1101	non-epitope	Mus
LQRKYGGAL	HLA-B0702	non-epitope	Mus
TPRMCTREE	HLA-B0702	non-epitope	Mus
KPGTSGSPI	HLA-B0702	non-epitope	Mus
